1 **Non-coding Class Switch Recombination-related transcription in human**  
2 **normal and pathological immune responses**

3

4 Helena Kuri-Magaña<sup>1,2</sup>; Leonardo Collado-Torres<sup>3,4</sup>; Andrew E. Jaffe<sup>3,4,5,6</sup>; Humberto  
5 Valdovinos-Torres<sup>1</sup>; Marbella Ovilla-Muñoz<sup>1</sup>; Juan M Téllez-Sosa<sup>1</sup>; Laura C Bonifaz  
6 Alfonso<sup>7</sup>; Jesús Martínez-Barnetche<sup>1\*</sup>

7

8 1.- Centro de Investigación Sobre Enfermedades Infecciosas. Instituto Nacional de Salud  
9 Pública. Cuernavaca, Morelos. México.

10 2.- Programa de Doctorado en Ciencias Biomédicas. Universidad Nacional Autónoma de  
11 México.

12 3.- Lieber Institute for Brain Development. Baltimore, Maryland. USA.

13 4.- Center for Computational Biology, Johns Hopkins University, Baltimore, Maryland,  
14 USA.

15 5.- Department of Mental Health, Johns Hopkins Bloomberg School of Public Health,  
16 Baltimore, Maryland, USA.

17 6.- Department of Biostatistics, Johns Hopkins Bloomberg School of Public Health,  
18 Baltimore, Maryland, USA.

19 7.- Unidad de Investigación Médica en Inmunoquímica. Hospital de Especialidades. Centro  
20 Médico Nacional Siglo XXI. IMSS. México City. México.

21 \* [jmbarnet@insp.mx](mailto:jmbarnet@insp.mx)

22

## 23 **Abstract**

24 **Background:** Antibody class switch recombination (CSR) to IgG, IgA or IgE is a  
25 hallmark of adaptive immunity, allowing antibody function diversification beyond IgM.  
26 CSR involves a deletion of the IgM/IgD constant region genes placing a new acceptor  
27 Constant ( $C_H$ ) gene, downstream of the  $VDJ_H$  exon. CSR depends on non-coding (CSRnc)  
28 transcription of donor  $I_\mu$  and acceptor  $I_H$  exons, located 5' upstream of each  $C_H$  coding  
29 gene. Although our knowledge of the role of CSRnc transcription has advanced greatly, its  
30 extension and importance in healthy and diseased humans is scarce.

31 **Methods:** We analyzed CSRnc transcription in 70,603 publicly available RNA-seq  
32 samples, including GTEx, TCGA and the Sequence Read Archive (SRA) using *recount2*,  
33 an online resource consisting of normalized RNA-seq gene and exon counts, as well as  
34 coverage *BigWig* files that can be programmatically accessed through R. CSRnc  
35 transcription was validated with a qRT-PCR assay for  $I_\mu$ ,  $I_{\gamma 3}$  and  $I_{\gamma 1}$  in humans in response  
36 to vaccination.

37 **Results:** We mapped  $I_H$  transcription for the human IgH locus, including the less  
38 understood *IGHD* gene. CSRnc transcription was restricted to B cells and is widely  
39 distributed in normal adult tissues, but predominant in blood, spleen, MALT-containing  
40 tissues, visceral adipose tissue and some so-called “immune privileged” tissues. However,  
41 significant  $I_{\gamma 4}$  expression was found even in non-lymphoid fetal tissues. CSRnc expression  
42 in cancer tissues mimicked the expression of their normal counterparts, with notable pattern  
43 changes in some common cancer subsets. CSRnc transcription in tumors appears to result  
44 from tumor infiltration by B cells, since CSRnc transcription was not detected in  
45 corresponding tumor-derived immortal cell lines. Additionally, significantly increased  $I_\delta$   
46 transcription in ileal mucosa in Crohn’s disease with ulceration was found.

47 **Conclusions:** CSRnc transcription occurs in multiple anatomical locations beyond  
48 classical secondary lymphoid organs, representing a potentially useful marker of effector B  
49 cell responses in normal and pathological immune responses. The pattern of  $I_H$  exon  
50 expression may reveal clues of the local immune response (i.e. cytokine milieu) in health  
51 and disease. This is a great example of how the public *recount2* data can be used to further  
52 our understanding of transcription, including regions outside the known transcriptome.

53

54 **Keywords:** Ig class switch recombination, B cells, Germinal Center, non-coding  
55 transcription, RNA-seq, data mining, tumor microenvironment, antibody, Vaccination,  
56 Crohn's disease.

## 57 **Background**

58 The hallmark of the humoral adaptive immune response is the production of high affinity  
59 class-switched antibodies from relatively low-affinity IgM<sup>+</sup> naive precursors. Affinity  
60 maturation and class switch recombination (CSR) are tightly regulated, molecular processes  
61 that occur in a specialized microenvironment within secondary lymphoid organs known as  
62 the germinal center (GC). Upon T-dependent antigen stimulation, IgM<sup>+</sup> naive B cells re-  
63 localize into the B cell follicle, undergo clonal expansion within the GC. The GC reaction  
64 is an iterative process of mutation-selection that leads to the generation of antigen-specific  
65 high affinity, class-switched memory B cells and long-lived antibody secreting plasma cells  
66 (reviewed in [1]). Antibody class switching from IgM to IgG, IgA or IgE allows effector  
67 function diversification. Both memory B cells and long-lived plasma cells are critical  
68 determinants of vaccine efficacy [2].

69 CSR involves a deletion of a genomic segment from the *IGHM/IGHD* coding  
70 interval ( $C_{\mu}$ - $C_{\delta}$ ) to the upstream flank of one of the *IGHG*, *IGHA* or *IGHE* genes in the  
71 telomeric region of human chromosome 14. Activated GC B cells upregulate the Activation  
72 Induced Cytidine Deaminase (AID), which deaminates cytidines in the G-rich Switch (S)  
73 regions located upstream of each immunoglobulin constant coding gene ( $C_H$ ). Cytidine  
74 deamination induces DNA damage response, which eventually leads to double stranded  
75 DNA breaks in both donor ( $S_{\mu}$ ) and the corresponding acceptor S region. The chromosomal  
76 ends are rejoined and the  $C_{\mu}$ - $C_{\delta}$ -encoding intervening DNA segment is re-circularized in a  
77 non-replicating episome by non-homologous end joining (reviewed in [3]).

78 The initiation of CSR depends on non-coding transcription of  $I_H$  exons, known as  
79 germline or “sterile” transcripts (referred hereafter as CSRnc transcription).  $I_H$  exons are  
80 located in the 5' region of each S- $C_H$  gene module. Non-coding transcription of  $I_H$  exons  
81 extends to the S and  $C_H$  region, is coupled to chromatin remodeling and is dependent on  
82 splicing [4, 5]. CSRnc transcripts form an R-loop in the corresponding S region, which

83 recruits AID to target S region deamination and CSR (reviewed in [6]). The precise  
84 mechanism of AID targeting to the S<sub>H</sub> region remains elusive, and off-target AID activity is  
85 implicated in the genesis of B cell malignancies [6, 7].

86 CSR is a complex cellular process that occurs in specialized microenvironments in  
87 secondary and tertiary lymphoid organs. The cellular choice of which I<sub>H</sub> to transcribe, and  
88 consequently the Ig class to switch to, is influenced by the availability of certain cytokines  
89 such as IL-4, IFN $\gamma$ , TGF $\beta$  and PAMP's, among others. Such environmental cues are  
90 thought to trigger specific signals that promote selective transcription of a given I<sub>H</sub> exon,  
91 guiding CRS according to a particular microenvironment or pathogenic insult [3]. CSRnc  
92 transcription patterns may reflect distinctive immunological events, such as the dependence  
93 of T cell help and other micro-environmental signals. Thus, CSRnc transcription  
94 quantitation during normal and pathological human immune responses could uncover novel  
95 pathogenic mechanisms and transcriptional signatures with potential clinical value. In  
96 addition, despite CSRnc transcription is biologically linked to B cells, its expression in  
97 other cell types has not been ruled out.

98 The recent explosion in the generation of public genomic data, and in particular  
99 transcriptome-wide profiling with RNA sequencing (RNA-seq) provides a unique  
100 opportunity to explore previously unannotated features in the human genome. To  
101 characterize CSRnc transcription in normal and pathological conditions, we tested CSRnc  
102 transcription in human vaccination and analyzed the transcriptional landscape of the human  
103 IgH locus using more than 70,000 publicly available human RNA-seq samples from a wide  
104 variety of research projects, including the Genotype Tissue Expression project (GTEx) [8,  
105 9], The Cancer Genome Atlas (TCGA) [10, 11], and more than 2,000 projects from the  
106 Sequence Read Archive (SRA) using *recount2* [12].

107

108

## 109 **Results**

110 **CSRnc transcription is B cell-specific and its boundaries are diffuse:** Overall, *recount2*  
111 [12] comprises a highly heterogeneous catalog of RNA-seq experiments belonging to 2,036  
112 independent studies and comprising 70,603 samples. Each study is composed of an average  
113 of 34 samples. However, TCGA [10, 11] and GTEx (SRP012682) [8, 9] are two projects  
114 (studies) with the largest number of sequencing samples (11,284 and 9,661 respectively),  
115 and represent 29 % of our dataset (**Additional file 1: Figure S1**).

116 Although human CSRnc transcription has been evaluated by RT-PCR [5, 13, 14],  
117 the precise transcription boundaries, including alternate transcription initiation sites and  
118 splicing variants remain undefined. We selected RNA-seq samples derived from normal  
119 FACSsorted B cells to map CSRnc transcription and to define transcriptional boundaries for  
120 read count quantitation for further analysis (**Additional file 2: Table S1**) [15-21]. We  
121 found that in normal adult B cells, CSRnc boundaries are less sharply defined than coding  
122 transcripts, and as expected, extend into switch regions (**Figure 1**) [5]. Projects SRP045500  
123 [18] and SRP051688 [20] describing the transcriptome of isolated peripheral blood (PB)  
124 immune cells in healthy adults, including primary neutrophils, monocytes, myeloid  
125 dendritic cells, B, NK and T cells revealed that among terminally differentiated  
126 hematopoietic lineage-derived cells, CSRnc transcription is restricted to B cells (**Figure**  
127 **1A, Additional file 1: Figure S2**).

128 CSRnc and  $C_H$  coding transcription in isolated PB CD19<sup>+</sup> B cells was analyzed.  
129 High relative transcription of  $I_\mu$  and  $C_\mu$ , intermediate relative transcription of  $I_\delta$ ,  $I_{\gamma 3}$ ,  $I_{\gamma 1}$ ,  
130  $I_{\alpha 1.2}$ ,  $I_{\gamma 2}$ ,  $I_{\gamma 4}$  and  $I_{\alpha 2}$ , and low transcription of  $I_\epsilon$  and  $I_{\alpha 1.1}$  were characteristic of PB B cells  
131 (**Additional file 1: Figure S3A-C**) [15, 18]. Furthermore, CSRnc transcription was  
132 analyzed in tonsillar naive and germinal center B cells from project SRP021509 [16].  
133 CSRnc transcription for most  $I_H$  but not  $I_\epsilon$ , was relatively high in both naive and GC B cells  
134 (**Additional file 1. Figure S3D**). These findings indicate that CSRnc transcription is not  
135 exclusive of activated B cells, and agrees with previous findings demonstrating constitutive  
136 CSRnc transcription [5, 14].

137 A transcriptionally active 309 base-pair (bp) region within the *IGHM-IGHD* intron  
138 was identified (referred hereafter as  $I_{\delta}$ ) and was included for further analysis (**Figure 1B**).  
139 This region is homologous to  $I_{\mu}$ , overlaps with a previously described repeat termed  
140  $\Sigma\mu$ , implicated in  $\mu$ - $\delta$  CSR in  $IgD^{+}$  myelomas [22, 23]. For the *IGHA1* gene, we identified  
141 two potential  $I_H$  exons ( $I_{\alpha 1.1}$  and  $I_{\alpha 1.2}$ ) that were selected for downstream analysis (**Figure**  
142 **1C**).  $I_{\gamma 2}$  overlapped with a previously annotated lincRNA, ENST00000497397.1  
143 (AL928742.1) at ENSEMBL [24]. The genome coordinates of each  $I_H$  exon identified and  
144 further analyzed are in **Table 1**. Navigation across the IgH locus using the ENSEMBL  
145 Genome Browser [24] allowed to confirm that the predicted  $I_H$  exons include regions of  
146 RNAPolIII, H3K36 and H3K4 trimethylation enrichment in peripheral blood B cells and  
147 EBV-transformed B cells generated by the Roadmap Epigenomics and ENCODE projects  
148 [25, 26], indicating active transcription (**Additional file 1: Figure S4**). Overall, these  
149 results agree with the current model of CSRnc transcription [5]; however, the identification  
150 of novel transcribed elements adds complexity to the transcriptional regulation of the IgH  
151 locus.

152 **CSRnc transcription in peripheral blood is modified upon vaccination and does**  
153 **not depend on circulating plasmablasts:** CSRnc transcription increases upon B cell  
154 activation [5]. To validate that the predicted CSRnc transcripts were indeed induced upon  
155 activation, normal human B cells were stimulated with agents mimicking T-dependent  
156 activation (CD40 ligand, IL-21 and CpG) and T independent activation (CpG, Pokeweed  
157 mitogen and SAC) *in vitro* for 3 and 6 days. Total RNA was obtained and  $I_{\mu}$ ,  $I_{\gamma 3}$  and  $I_{\gamma 1}$   
158 CSRnc and AID transcripts were quantified by qRT-PCR (**Figure 2A-D**). CSRnc  
159 transcripts were detected in B cells activated by both T-dependent and T-independent  
160 activators, but transcription levels were significantly higher for T-dependent like activation.  
161 In both types of activation, CSRnc transcription at 6 days post-activation was higher than 3  
162 days post-activation (**Figure 2A-D**). The highest transcription was for  $I_{\mu}$  (3-fold higher than  
163  $I_{\gamma 1}$  and  $I_{\gamma 3}$ ). Transcription of AID showed the same pattern as CSRnc transcripts (**Figure**  
164 **2D**).

165 Immunization promotes an antigen-specific mobilization of plasmablasts to  
166 peripheral blood around day 7 post-challenge [27, 28]. This plasmablast wave is thought to

167 derive from germinal centers [29]. Thus, we hypothesized that the level of CSRnc  
168 transcription in peripheral blood correlates with the amount of plasmablasts. We assessed  
169 CSRnc transcription and plasmablast proportion in peripheral blood of healthy subjects  
170 before, 7 and 14 days post vaccination with either hepatitis B (HB) alone or in combination  
171 with tetanus/diphtheria vaccine (TT/Dp) (**Figure 2E-K**). Regarding pre-immune levels,  $I_{\mu}$   
172 transcription was not affected at day 7 (mean  $0.95 \pm 0.5$ ,  $p = 0.76$ ) or at day 14 (mean  $2.04$   
173  $\pm 2$ ,  $p = 0.073$ ), however at day 14 was higher than at day 7 ( $p = 0.01$ ) (Figure 2E).  $I_{\gamma 1}$   
174 transcription was neither affected at day 7 (mean  $2.9 \pm 3.2$ ,  $p = 0.057$ ) nor at day 14 (mean  
175  $1.02 \pm 0.9$ ,  $p = 0.57$ ) (Figure 2F). Contrastingly,  $I_{\gamma 3}$  transcription regarding pre-immune  
176 levels was reduced at day 7 (mean  $0.76 \pm 0.3$ ,  $p = 0.016$ ) and increased at day 14 (mean  
177  $1.73 \pm 1.1$ ,  $p = 0.021$ ). As expected,  $I_{\gamma 3}$  transcription at day 14 was higher than at day 7 ( $p =$   
178  $0.0002$ ) (Figure 2G). No changes were detected in AID expression (Figure 2H).

179 Plasmablast levels peaked at day 7 post-vaccination ( $p = 0.011$ ), and returned to pre-  
180 vaccine levels 14 days post-vaccination, as previously described [27, 28]. There was no  
181 correlation between plasmablasts and  $I_{\gamma 1}$  transcription increase at day 7 (LTS method.  
182 Adjusted  $R^2 = -0.1265$ , F-statistic: 0.1013 on 1 and 7 DF,  $p = 0.75$ ). However, plasmablast  
183 and  $I_{\mu}$  transcription correlated at day 7 (**Figure 2J**) (LTS method. Adjusted  $R^2 = 0.53$ ; F-  
184 statistic = 10.17 on 1 and 7 DF,  $p = 0.015$ ). Interestingly, plasmablast fold-change at day 7  
185 negatively correlated with  $I_{\gamma 3}$  transcription (**Figure 2K**) (LTS method. Adjusted  $R^2 = 0.63$ ;  
186 F-statistic = 13.04 on 1 and 6 DF, p-value: 0.011). No changes in  $I_{\mu}$ ,  $I_{\gamma 1}$  and  $I_{\gamma 3}$  transcription  
187 was detected in response to influenza vaccination (**Figure 2L-O**). Overall, these results  
188 suggest that an increase in CSRnc transcription in peripheral blood upon vaccination is  
189 dependent on vaccine type, and that the contribution of vaccine-mobilized plasmablasts to  
190 CSRnc transcription is negligible.

191 **CSRnc transcription is prevalent in a large fraction of the *recount2* dataset, with**  
192 **predominant transcription of  $I_{\mu}$ :** Normalized counts (RPKM) obtained with *recount2*  
193 were used to assess CSRnc transcription in the SRA, TCGA and GTEx datasets. We found  
194 no CSRnc transcription (RPKM = 0) in any of the 10  $I_H$  exons in a substantial fraction of  
195 the whole dataset ( $n = 26,512$  samples; 37%) (**Table 2**). The  $I_H$   $\log_2$ -transformed RPKM  
196 average (2.65) for each non-zero RPKM sample ( $n = 44,091$ ; 62.4 %) was used to define an

197 expression cutoff. “High” CSRnc transcription was defined as a mean  $\log_2$  RPKM of 2.65  
198 or higher. Only 29.8 % of RNA-seq samples ( $n = 21,017$ ) were above this expression  
199 cutoff. “Low” CSRnc transcription was defined as a mean  $\log_2$  RPKM  $< 2.65$  (**Figure 3A.**  
200 **Table 2**), which accounted for the remaining 32.7 % of the samples ( $n = 23,074$ ). The  
201 CSRnc transcription levels varied according to  $I_H$ . Higher transcription ( $\log_2$  RPKM), as  
202 well as a more widespread transcription (proportion of samples) was found for  $I_\mu$  in all  
203 datasets (**Additional file 1: Figure S5**).

204 **The *recount2* dataset is partitioned in distinctive CSRnc transcription profiles:** We  
205 further de-convoluted CSRnc transcription according to  $I_H$  relative transcription profile. To  
206 do so, the entire non-zero dataset including GTEx, TCGA and SRA Z-scores was clustered  
207 in 10 groups using  $k$ -means clustering (**Figure 3B. Additional file 1: Figure S6**). Using Z0  
208 as reference, each of  $I_H$  showed a distinctive expression pattern in the remaining Z clusters  
209 ( $\log_2$  RPKM regression analysis. F-statistic: p-value:  $< 2.2e-16$ ). Clusters Z0, Z2 and Z8  
210 were characterized by low (mean  $\log_2$  RPKM  $< 2.65$  or Z score  $< 0$ ) CSRnc transcription in  
211 all  $I_H$  classes. Clusters Z4, Z6 and Z7 were characterized by “high” expression of  $I_\mu$  only  
212 (mean  $\log_2$  RPKM  $> 2.65$ ). Cluster Z3 showed “high” expression in  $I_\mu$  and  $I_{\alpha 2}$ . Cluster Z1  
213 showed high expression in  $I_\mu$ ,  $I_{\gamma 1}$  and  $I_{\gamma 4}$ . Finally, clusters Z5 and Z9 showed “high”  
214 expression in all  $I_H$ ’s (**Figure 3B. Additional file 1: Figure S6**).

215 **CSRnc transcription is widely distributed in healthy tissues, with particular profiles**  
216 **according to tissue:** To gain insight into CSRnc expression patterns in healthy adult  
217 human tissues, we used GTEx samples as a reference. Non-zero RPKM per tissue samples  
218 were ranked according to their mean  $\log_2$  RPKM. Higher average transcription was found  
219 in lymphoid tissues such as spleen, EBV-transformed B lymphocytes and whole blood, but  
220 also in organs with mucosal-associated lymphoid tissues (MALT) such as terminal ileum,  
221 transverse colon, stomach, lung and esophageal mucosa (**Figure 4**). A remarkable  
222 difference in average  $\log_2$  RPKM is observed in transverse colon (mean  $7.5 \pm 3.9$ ) and  
223 sigmoid colon (mean  $2.1 \pm 3.2$ ). Interestingly, salivary gland expression was among the  
224 tissues with highest transcription, and non-mucosal tissues such as thyroid and pituitary  
225 gland showed high average  $I_H$  transcription. Another notable difference in average  $\log_2$   
226 RPKM was observed between visceral adipose tissue (omentum; mean  $4.9 \pm 2.3$ ) and



227 subcutaneous adipose tissue (mean  $1.9 \pm 1.5$ ). Conversely, samples of tissues such as brain,  
228 skeletal and cardiac muscle, skin, as well as chronic myelogenous leukemia cell line K562  
229 and transformed dermal fibroblast cell lines showed the lowest CSRnc transcription levels  
230 (mean  $\log_2$  RPKM  $< 2.65$ ) (**Figure 4**).

231 Using whole blood as reference tissue, we performed a linear regression analysis of  
232 each  $I_H$  by tissue type. The transcription pattern of each  $I_H$  in whole blood was significantly  
233 different ( $p < 2.2e-16$ ) (**Figure 5**).  $I_\mu$  transcription was similar to  $I_H$  average transcription  
234 (**Figure 4 and 5**), in which higher transcription was observed in spleen, terminal ileum,  
235 salivary gland, and transverse colon than blood. Of note,  $I_\mu$  transcription in testis was  
236 particularly low, despite its high average transcription.  $I_\delta$  transcription was similar to  $I_\mu$   
237 transcription, but only spleen and terminal ileum were significantly higher.  $I_{\gamma 3}$ ,  $I_{\gamma 1}$  and  $I_{\gamma 2}$   
238 transcription was similar and was higher in spleen than in blood ( $p < 2e-16$ ) (**Figure 5**).

239 For most tissues, transcription of  $I_{\alpha 1.1}$  and  $I_{\alpha 1.2}$  was highly correlated, however some  
240 differences were noted.  $I_{\alpha 1.1}$  transcription was higher in terminal ileum and transverse colon  
241 than in blood ( $p < 0.001$ ). In contrast,  $I_{\alpha 1.2}$  transcription was higher in spleen and salivary  
242 gland than in blood ( $p < 2e-16$ ).  $I_{\alpha 2}$  transcription was similar to  $I_{\alpha 1.2}$  transcription, but also  
243 was higher in stomach, esophageal mucosa than in blood ( $p < 1.1e-05$ ) (**Figure 5**). Thus,  
244  $I_{\alpha 1}$  and  $I_{\alpha 2}$  transcription pattern matches with the fact of IgA as the main immunoglobulin  
245 in mucosal tissue. Furthermore, our results suggest that CSR to IgA may involve tissue-  
246 dependent alternative transcription initiation and/or splicing in the corresponding CSRnc  
247 transcripts.

248 The most unexpected patterns of CSRnc transcription corresponded to  $I_{\gamma 4}$  and  
249  $I_e$ . Transcription for both was higher in spleen, terminal ileum and EBV-transformed B-  
250 cells than in blood ( $p < 0.01$ ). However,  $I_{\gamma 4}$  transcription was higher in thyroid, visceral  
251 adipose tissue (omentum), testis, than in blood ( $p < 2e-16$ ). Similarly,  $I_e$  transcription was  
252 higher in in thyroid than in blood ( $p < 0.00003$ ) (**Figure 5**).

253 Consistently, de-convolution of CSRnc transcription according to  $I_H$  relative  
254 expression (Z-score) revealed that terminal ileum, spleen, transverse colon, whole blood  
255 and salivary gland share a similar expression pattern and are highly enriched (FDR  $< 0.001$ )

256 in clusters Z5 and Z9 (high transcription in all  $I_H$ 's) (**Figure 6**). Some tissues with MALT  
257 such as stomach, esophageal mucosa and lung shared a similar  $I_H$  transcription pattern and  
258 were enriched in cluster Z5 and Z3 (high  $I_\mu$  and  $I_{\alpha 2}$  transcription) (FDR < 0.001), whereas  
259 others such as breast, vagina, liver were enriched in cluster Z3 and Z6 ( $I_\mu$  only). Testis,  
260 thyroid, pituitary and omentum, characterized by the highest  $I_{\gamma 4}$  transcription, were enriched  
261 in cluster Z1 ( $I_\mu$ ,  $I_{\gamma 1}$  and high  $I_{\gamma 4}$ ) (FDR < 0.001). Finally, the remaining tissues such as  
262 subcutaneous adipose tissue, arteries, brain, skeletal and cardiac muscle, skin, transformed  
263 fibroblasts and K562 cell lines, were enriched in Z0, Z2 and Z8 (low CSRnc transcription  
264 in all  $I_H$  classes) (FDR < 0.001) (**Figure 6**), and in few cases were enriched in clusters Z4  
265 and Z6 ( $I_\mu$  only) (FDR < 0.001).

266 The observed anatomical distribution and abundance of CSRnc transcription  
267 suggests that the amount of CSRnc transcription may be dependent on the abundance of B  
268 cells present in a given tissue. We used the  $C_H$  coding transcript  $\log_2$ RPKM as a proxy of  
269 the amount of B cells in the tissue. In general,  $C_H$  transcription was 10 to 100-fold higher  
270 than CSRnc transcription. To correlate CSRnc transcription with corresponding  $C_H$   
271 transcription, Z-scores were used. As expected for each class, CSRnc and  $C_H$  Z-scores  
272 were significantly correlated ( $p < 1.0e-16$ ), suggesting that the higher numbers of B cells  
273 or plasma cells in a given tissue, higher CSRnc transcription. However, we have noticed  
274 that for most classes, a fraction of samples deviates from the expected orthogonal  
275 correlation, indicating higher CSRnc transcription relative to the  $C_H$  transcript. This is  
276 particularly notable for  $I_\mu$ , but also,  $I_{\gamma 1}$ ,  $I_{\gamma 4}$  and  $I_{\alpha 2}$  (**Additional file 1: Figure S7**).

277  **$I_\mu$  transcription occurs in early lymphoid progenitors and  $I_{\gamma 4}$  is widely**  
278 **expressed in non-lymphoid fetal tissues:** CSRnc transcription was addressed in early  
279 lymphoid development using data from study SRP058719, which addresses transcription in  
280 early lymphoid differentiation prior to and after B and T cell lineage commitment using  
281 RNA-seq from FACSorted cells [30]. Interestingly, both B and T lineage precursors  
282 expressed  $I_\mu$ . Enriched hematopoietic stem cells (HSC's  $CD34^+CD38^-lin^-$ ), lymphoid-  
283 primed multipotent progenitors (LMPP's,  $CD34^+CD38^+CD10^-CD45RA^+lin^-$ ), common  
284 lymphoid progenitors (CLP's, ( $CD34^+CD38^+CD10^+CD45RA^+lin^-$ ), thymic  $CD34^+CD7^-$

285 CD1a<sup>-</sup> CD4<sup>-</sup>CD8<sup>-</sup> (Thy1) precursors and fully B cell-committed progenitors (BCPs,  
286 CD34<sup>+</sup>CD38<sup>+</sup>CD19<sup>+</sup>) expressed I $\mu$  (**Additional file 1: Figures S8 and S9**).

287 CSRnc expression was analyzed in fetal tissue by using project SRP055513 data,  
288 which reported an extensive RNA-seq analysis in twenty fetal tissues during gestational  
289 weeks 9-22 [31]. Remarkably, a robust I $\gamma$ <sub>4</sub> expression was detected in all fetal tissues tested,  
290 regardless of the gestational week and in the absence of additional I<sub>H</sub> and coding C<sub>H</sub>  
291 transcription (**Figure 7**). Higher average I $\gamma$ <sub>4</sub> expression is in spleen, followed by lung and  
292 liver. The latter has lympho-hematopoietic function in the fetal stage. In contrast with their  
293 adult counterparts, I $\gamma$ <sub>4</sub> was highly transcribed (Z-score > 0.8) in kidney, brain and muscle.

294 **CSRnc transcription in cancer varies according to cancer type and is likely to depend**  
295 **on the degree of B cell tumor infiltration:** The TCGA project data was used as a  
296 reference to study CSRnc transcription in a wide variety of human cancers. As for GTEx,  
297 CSRnc transcription (I<sub>H</sub> average log<sub>2</sub> RPKM distribution) was analyzed across 33 cancer  
298 types (**Figure 8**). I<sub>H</sub> transcription in diffuse large B cell lymphoma (DLBCL) and acute  
299 myeloid leukemia (AML) were the highest. In general, CSRnc transcription in neoplastic  
300 tissue mimicked its non-neoplastic counterparts, being high in lung, stomach, and testicular  
301 germ cell carcinomas. Conversely, CSRnc transcription was low in glial cell and skin  
302 cancers (**Figure 8**).

303 A direct comparison between CSRnc transcription in healthy (GTEx) and neoplastic  
304 tissue allowed the identification of three distinct patterns (**Figure 9**): **1)** Tumors where  
305 average CSRnc transcription is lower than in healthy tissue, such as in DLBCL, prostate,  
306 thyroid, liver and colon cancer (**Figure 9 A-E**). **2)** Tumors where average CSRnc  
307 transcription was higher than its healthy tissue counterpart, such as breast, rectum,  
308 testicular germ cell, pancreas carcinomas, ovarian cystadenoma and skin melanoma  
309 (**Figure 9 G-L**). **3)** Tumors with no difference in CSRnc transcription between healthy and  
310 neoplastic counterpart, such as stomach and esophagus (**Additional file 1: Figure S10**).  
311 Interestingly, using healthy kidney cortex as reference for kidney tumors, CSRnc  
312 transcription varied according to cancer type, CSRnc transcription was significantly lower  
313 in chromophobe and papillary carcinomas, but not in clear cell carcinoma. (**Figure 9F**). In

314 adrenal gland, a similar pattern was observed, with lower CSRnc transcription in  
315 adrenocortical carcinoma, but not pheochromocytoma (**Additional file 1: Figure S10**).

316 The correlation between CSRnc and C<sub>H</sub> transcription (**Additional file 1: Figure S7**)  
317 suggests that as for healthy tissues, CSRnc transcription derives from tertiary lymphoid  
318 infiltrates resulting from tumor-associated inflammation and the corresponding mucosal  
319 associated lymphoid tissues [32]. To address this question, we analyzed CSRnc  
320 transcription in a wide variety of tumor-derived cell lines in SRA. The majority of the  
321 representative tumor derived cell lines tested (i.e., lung cancer A549 cells, breast cancer  
322 MCF-7 cells, and colon cancer HCT116 cells), were depleted in samples expressing CSRnc  
323 RNA (**Additional file 2: Table S2**), indicating that CSRnc transcription in cancer derives  
324 from infiltrating B cells and not the neoplastic cells *per se*. Nevertheless, using this  
325 approach, CSRnc transcription in cancer cells *in situ* cannot be ruled out.

326 **CSRnc transcription is altered in certain infectious conditions and a I<sub>δ</sub>-I<sub>α2</sub>**  
327 **transcriptional signature is associated with pediatric Crohn's disease with deep**  
328 **ulceration:** The SRA dataset represents the most diverse collection of data regarding  
329 methodological approaches and subjects of interest and represents a useful source of data  
330 related to diverse malignancies, as well as infectious and non-infectious inflammatory  
331 pathology. Using MetaSRA Disease Ontology annotations [33], we identified significant  
332 enrichment of acute AML, breast and lung cancers in SRA samples with CRSnc  
333 transcription, confirming our observations derived from TCGA data analysis.

334 Moreover, the SRA dataset allowed us to identify enriched CSRnc expression in  
335 infectious diseases such as diarrhea, brucellosis and malaria. However, in all cases,  
336 peripheral blood samples were used for these experiments. To distinguish if the enrichment  
337 was due to increased expression, rather than for the inherent enrichment observed in blood  
338 (**Figures 4 and 5**), we performed differential expression analysis comparing experimental  
339 groups provided by SRA metadata. Significant reduction of CSRnc transcription was  
340 detected in enterobacteria, but not in rotavirus diarrheal disease (SRP059039), malaria  
341 (SRP032775) [34], brucellosis and leishmaniasis (SRP059172) (**Additional file 2: Table**  
342 **S3**). SRA data from influenza vaccination (SRP020491) [15] was consistent with our own  
343 experimental data demonstrating no significant changes in CSRnc transcription 7 days post-

344 vaccination, regardless the plasmablast migration wave to peripheral blood at that time,  
345 indicating that CSRnc transcripts observed in peripheral blood do not derive from recently  
346 class-switched plasmablasts (**Figures 2L-O**). CSRnc transcription in response to influenza  
347 vaccination contrasted with the observation that natural infection with H7N9 [35]  
348 (SRP033696), in which we observed changes in coding and CSRnc transcription  
349 (**Additional file 2: Table S3**).

350 The SRA dataset also showed enrichment for autoimmune disease terms such as  
351 systemic lupus erythematosus and autoinflammatory diseases like inflammatory bowel  
352 disease. No significant differential expression was observed in peripheral blood  
353 transcriptomes in systemic lupus erythematosus patients compared with healthy subjects  
354 (SRP062966) [36] (**Additional file 2: Table S3**). However, a study comparing the ileal  
355 transcriptome in pediatric Crohn's disease (CD) with and without deep ulceration, and with  
356 or without ileal involvement (SRP042228) [37], revealed an increased significant  
357 expression for  $I_{\mu}$ ,  $I_{\delta}$  and  $I_{\alpha 2}$  in patients with deep ulcerated CD, regardless the presence of  
358 macroscopic or microscopic inflammation (**Figure 10 and Additional file 2: Table S3**).

## 359 Discussion

360 We performed an integral, systematic analysis of human CSRnc transcription using  
361 an experimental approach and datamining of a large and diverse public RNA-seq dataset  
362 supported by a previously described resource, *recount2* [12]. The precise I-exon boundaries  
363 for every class were undefined and are not annotated in current human genome version  
364 (GRCh38.p12). Among hematopoietic-derived cells, CSRnc transcription was specific for  
365 B cells, and consistent with previous findings was present in naive as well as GC-B cells  
366 [5].

367 The present study has certain limitations. CSRnc transcription is required for CSR,  
368 however it does not prove that CSR is actively taking place. Among the most determinant  
369 factors influencing the amount of CSRnc transcription observed in an RNA-seq sample is  
370 the relative amount of B cells expressing a particular I-exon, as suggested by the high Z-  
371 score correlation between CSRnc and its corresponding  $C_H$  transcript (**Additional file 1:**  
372 **Figure S7**). We propose that the higher non-coding/coding Z-score ratio indicates a higher

373 proportion of B cells undergoing a particular CSR event. Other factors influencing the  
374 amount of CSRnc transcription is that switch circles are transcriptionally active [38], and  
375 our current analysis cannot differentiate if CSRnc transcripts derive from chromosomal or  
376 switch circle transcription. Switch circles are non-replicating episomes that decay with B  
377 cell division [39-41]. Thus, B cells undergoing cell division at high rate (i.e., GC B cells)  
378 should dilute the amount of circle templates in a greater extent than non-dividing B cells.

379 A novel transcribed element ( $I_\delta$ ) located in the *IGHM-IGHD* intergenic region was  
380 identified, which overlaps with a previously described repeat  $\Sigma_\mu$  region, downstream of an  
381 atypical switch region ( $\sigma\delta$ ) involved in non-classical CSR to IgD in mice [42] and humans  
382 [43-45]. The  $\Sigma_\mu$  region was originally described as mediator of  $\mu$ - $\delta$  CSR by homologous  
383 recombination in myeloma cell lines [22, 23]. The biological role of  $\Sigma_\mu$  is uncertain,  
384 because IgD<sup>+</sup> EBV-transformed cell lines and human tonsillar B cells undergo  $\mu$ - $\delta$  CSR by  
385 non-homologous recombination using  $\sigma\delta$  as acceptor switch region [43, 45], in an AID-  
386 dependent fashion [44]. Here, we demonstrate that  $I_\delta$  ( $\Sigma_\mu$ ) can be actively transcribed  
387 (**Figure 1B**). Nonetheless,  $I_\delta$  as an acceptor I-exon does not fit into the general model of  
388 CSR, because it is located downstream of the  $\sigma\delta$  region. Further research is required to  
389 elucidate if  $I_\delta$  transcription is involved in the non-classical  $\mu$ - $\delta$  CSR.

390 An important motivation for this work was the identification of early transcriptional  
391 signatures in blood that correlated with the strength and quality of the humoral response,  
392 and in particular with the GC response. Interestingly, Hepatitis B and or Tetanus/Diphtheria  
393 vaccination induced  $I_\mu$ , and  $I_{\gamma3}$  transcription in peripheral blood at day 14 post-vaccination,  
394 but not when plasmablasts peaked (day 7 post-vaccination), suggesting that CSRnc  
395 transcription may not be the result of plasmablast mobilization to peripheral blood.  
396 Moreover, we observed increased  $I_{\gamma1}$  and  $I_{\alpha1}$  transcription in natural H7N9 infection, but  
397 not upon influenza vaccination (**Figure 2, Additional file 2: Table S3**), or in rotavirus  
398 infection (**Additional file 2: Table S3**). The differential response observed upon influenza  
399 vaccination and natural rotavirus infection in contrast to HBV/tetanus-diphtheria vaccination  
400 and H7N9 infection may be the result of the common repeated exposure to seasonal  
401 influenza or rotavirus, which would reactivate IgG<sup>+</sup> memory B cells and in the absence of  
402 CSR [46].

403           Although  $I_H$  transcription is highly inducible upon activation (**Figure 2A-D**), GTEx  
404 and SRA mining revealed that  $I_\mu$  transcription was higher than other  $I_H$ . This is consistent  
405 with the current model of CSR, in which  $I_\mu$  is constitutively transcribed under the control of  
406 the  $\mu$  intronic enhancer ( $E_\mu$ ), and its transcription is required for CSR regardless of the  
407 acceptor class [47].  $E_\mu$  participates in chromatin remodeling of the IgH locus during lineage  
408 commitment and VDJ recombination [48, 49], and its deletion impairs B cell development,  
409  $I_\mu$  transcription and CSR [50].

410           We identified distinctive CSRnc transcriptional patterns related to known  
411 immunological functions, such as  $I_\mu$  and  $I_{\alpha 2}$  co-expression in MALT-rich organs, where  
412 active IgA secretion takes place. Of particular interest is cluster Z1, defined by an  $I_{\gamma 1}$ ,  $I_{\gamma 2}$   
413 and  $I_{\gamma 4}$  transcriptional signature. Z1 cluster was the only cluster with higher expression of  
414  $I_{\gamma 4}$ , and was characteristic of the testis, thyroid gland and visceral adipose tissue (omentum),  
415 but not subcutaneous adipose tissue. Visceral adipose lymphoid B cells are  
416 immunologically active cells implicated in adipose tissue homeostasis that may play  
417 important pro-inflammatory roles associated with metabolic syndrome and obesity [51].  
418 The expression of  $I_{\gamma 1}$  and  $I_{\gamma 4}$  transcriptional signature in testis and thyroid is unexpected,  
419 because they are regarded as immune-privileged sites devoid of secondary/tertiary  
420 lymphoid organs [52]. Similarly, higher  $I_\epsilon$  transcription in the thyroid gland is a striking  
421 finding worthy of further research due to the common association of atopic disease with  
422 autoimmune thyroiditis [53]. At present, we do not know if CSR to IgG<sub>4</sub> or IgE is taking  
423 place, however further research is required given that IgG<sub>4</sub> is an atypical Ig that lacks Fc-  
424 mediated effector functions [54] and IgE could be implicated in autoimmunity.  
425 Furthermore,  $I_{\gamma 4}$  transcription in different fetal tissues suggests that its transcription is not  
426 limited to lymphoid tissue, may be a common feature of multipotency and is not necessarily  
427 coupled with  $C_H$  transcription, suggesting additional functions beyond CSR.

428           A major goal of the GTEx project was to identify the role of genetic variation in  
429 gene expression as a quantitative trait. Tissue enrichment in two clusters with qualitatively  
430 different  $I_H$  transcriptional pattern such as in liver (Z3 and Z6), testis (Z1 and Z2), terminal  
431 ileum (Z5 and Z9) and whole blood (Z5, Z7 and Z9) indicate CSRnc transcriptional  
432 heterogeneity in tissue donors involved in the GTEx project. This could result from

433 different tissue microenvironments (i.e., cytokine/chemokine milieu, microbiota and  
434 environmental stimuli) as well as genetics, which may modify CSRnc transcription patterns  
435 and possibly CSR itself. A recent study identified four SNP's in the human IgH locus  
436 presumably involved in CSR that affect immunoglobulin levels [55]. Their implication in  
437 modifying CSRnc transcription warrants further investigation.

438         The study of CSRnc transcription in cancer is of particular interest for several  
439 reasons: **1)** The anti-tumor response is largely mediated by the presentation of tumor neo-  
440 antigens to T cells and T<sub>reg</sub> balance. However, antibody-mediated anti-tumor activity can be  
441 achieved by antibody - dependent cytotoxicity or other mechanisms [32]. **2)** The presence  
442 of ectopic (or tertiary) lymphoid structures (ELS) [32, 56] and higher densities of  
443 infiltrating B cells and T follicular helper cells correlate with improved survival in lung  
444 [57], breast [58] and colorectal carcinoma [59]. **3)** The tumor microenvironment, including  
445 certain cytokines may modify CSR patterns in infiltrating and ELS B cells, regardless the  
446 antibody effector function. **4)** AID activity is a known contributor to off-target mutagenesis  
447 and genomic instability in B cell malignancies [60]. Aberrant AID and CSRnc transcription  
448 in non-lymphoid tumor cells could potentially contribute to cytidine deaminases - mediated  
449 kataegis [61].

450         We have found that average I<sub>H</sub> expression in certain tumors analyzed in the TCGA  
451 project resembles their non-neoplastic counterpart, however some cancer types have  
452 significantly less CSRnc transcription, whereas others show the opposite. Most of the  
453 evidence we have gathered so far indicate that the origin of I<sub>H</sub> transcription is in the tumor  
454 infiltrating and ELS B cells, rather than the tumor cells *per se* (**Additional file 2: Table**  
455 **S2**). Thus, differences in I<sub>H</sub> transcription in cancer may be the result of immune editing  
456 [62], which may alter the amount and activation state of the infiltrating and ELS B cells.  
457 Based on gene expression signature clustering, all non-hematologic cancers of the TCGA  
458 project were classified into six immunologically distinct subtypes with distinctive somatic  
459 aberration patterns, tumor microenvironment including the amount and cell type  
460 infiltration, and clinical outcome [63, 64]. The relation between these six immunological  
461 subtypes with CSRnc transcription pattern may help to understand the elusive role of  
462 infiltrating B cells in the progression of different cancer types [32].



463 Despite the limitation of relying on public data when often the submitter researcher  
464 chooses to submit the minimal requirements of sample metadata, the SRA represents an  
465 enormous source of RNA-seq data from a highly diverse type of studies. In contrast to the  
466 standardized methodological criteria and metadata collection protocols used by the GTEx  
467 and TCGA consortiums, higher methodological variability in SRA data is expected,  
468 limiting inter-study comparisons. Nevertheless, we were able to identify a  $I_{\mu}$ - $I_{\delta}$ -  
469  $I_{\alpha 2}$  signature in ileal mucosa of Crohn's disease in a treatment-naïve pediatric cohort [37].  
470  $I_{\mu}$  and  $I_{\alpha 2}$  is somehow expected as the result of predominant IgM to IgA CSR on mucosal  
471 tissue (**Figures 4-6**), and its exacerbation due to increased tissue B cell infiltration in  
472 response to inflammation [37]. However, the increased  $I_{\delta}$  transcription, particularly in CD  
473 associated with deep ulceration is an intriguing finding (**Figure 10**). Serum IgD levels are  
474 elevated in patients with CD [65] and other autoinflammatory syndromes [44, 66]. A high  
475 proportion of  $\mu$ - $\delta$  switched IgD<sup>+</sup> cells bare autoreactive and poly-reactive specificities [67,  
476 68], a feature shared with “natural autoantibodies”, which are reactive against bacterial wall  
477 components and may provide natural immunity against bacterial infection [69]. In human  
478 respiratory mucosa,  $\mu$ - $\delta$  switched IgD<sup>+</sup> B cells mediate the innate-adaptive immunity and  
479 inflammatory cross talk [44]. Mice incapable of undergoing classic CSR due loss of  
480 function of 53BP1 have an intestinal microbiota-dependent elevation of IgD serum titers  
481 and increased  $\mu$ - $\delta$  switched IgD<sup>+</sup> B cells [70]. Direct experimental testing is required to  
482 elucidate the role of  $I_{\delta}$  transcription, its role in  $\mu$ - $\delta$  CSR and its implications in healthy and  
483 inflamed mucosae.

## 484 **Conclusions**

485 We have performed an unbiased analysis of the transcriptional landscape of the  
486 human *IGH* locus using a vast public RNA-seq dataset. Our observations agree with  
487 previous findings regarding constitutive CSRnc transcription in naïve B cells and its  
488 upregulation upon activation. We provide a detailed analysis of CSRnc transcription in  
489 healthy tissue. As expected, CSRnc transcription correlated with the amount of associated  
490 lymphoid tissue, however, novel transcriptional signatures involving  $I_{\mu 4}$  or  $I_{\epsilon}$  were found in  
491 testis, pituitary, thyroid and visceral adipose tissue were identified. Changes in CSRnc  
492 transcription between healthy and tumor tissue were also found, likely as a result of

493 immune editing. A novel transcribed element within the *IGHM-IGHD* intron termed  $I_{\delta}$  was  
494 discovered and highly expressed in ileal mucosae of pediatric Crohn' s disease patients.  
495 Overall, this study highlights the importance of open access data for discovery and  
496 generation of novel hypothesis amenable for direct testing, and is a great example of the  
497 potential of the *recount2* dataset to further our understanding of transcription, including  
498 regions outside the known transcriptome.

499

## 500 **Materials and methods:**

501 **Vaccination of human healthy volunteers:** Pre-immune (day 0), day 7, 15, 30 and 180  
502 post-vaccination peripheral blood samples (18 mL) were obtained by venipuncture in 2 x 8  
503 mL Vacutainer® CPT™ tubes from healthy volunteers vaccinated with Hepatitis B and/or  
504 Tetanus toxoid/Diphtheria (n = 16), or Trivalent Influenza Vaccine during season 2013-2014  
505 (A/California/7/2009 (H1N1) pdm09; A(H3N2) A/Victoria/361/2011; B/Massachusetts/  
506 2/2012) (n = 18). Written informed consent was obtained from each volunteer in each blood  
507 sample draw. All procedures in human subjects were performed after Institutional Review  
508 Board approval from the National Institute of Public Health (CI: 971/82-6684). Plasma and  
509 PBMCs were isolated according to the manufacturer's instructions, aliquoted and stored at -  
510 80°C and liquid N<sub>2</sub>, respectively. Total RNA was extracted from PBMCs with TRIzol and  
511 stored at -80°C until used.

512 **Quantitation of plasmablasts by FACS:** Cryopreserved PBMCs were thawed at 37° C  
513 and resuspended in RPMI 10% FBS, washed with PBS 1X and fixed with 1%  
514 paraformaldehyde for 20 min at room temperature. After washed with FACS solution (PBS  
515 1%, sodium azide 0.05% and 2% FBS), cells were incubated for 30 min at 4 °C with the  
516 following antibody cocktail: anti-CD3 PerCP/Cy5.5 (clone SKY; Biolegend; 344808), anti-  
517 CD19 FITC (clone HIB19; Biolegend; 302206), anti-CD20 PE Cy7 (clone 2H7; Biolegend;  
518 302312), anti-CD27 APC (clone O323; Biolegend;356410) and anti-CD38 PE (clone HIT2;  
519 Biolegend; 980302). Flow cytometry analysis was performed in a FACS Aria II (BD  
520 Biosciences, San Jose, CA, USA). Doublets and CD3+ events were gated out. Plasmablasts  
521 were defined as CD3<sup>-</sup>/CD19<sup>+</sup>/CD20<sup>-</sup>/CD27<sup>+</sup>/CD38<sup>+</sup>. 500-1000 plasmablasts were acquired  
522 per sample. Analysis was performed using Flowjo software (TreeStar).

523 **B cell *in vitro* stimulation:** PBMCs were isolated by Ficoll-Paque™ density gradient from  
524 blood bank buffy coats. B cells were enriched through negative selection using B cell  
525 Isolation Kit II (MACS, Miltenyi).  $1 \times 10^6$  B cells were seeded per well on 6-well plate  
526 incubated in RPMI medium supplemented with 10% FBS, streptomycin and penicillin at  
527 37°C with 5% CO<sub>2</sub>. Two activation conditions were established at different time points (3  
528 and 6 days post-activation: Germinal center-like activation (GC-like), 1µg/ml anti-human  
529 CD40 (G28.5), 5µg/ml CpG ODN 2006 (Invivogen) and 25ng/ml recombinant IL-21  
530 (eBiosciences). For T-independent activation, 5µg/ml CpG ODN 2006 (Invivogen), 0.05%  
531 *S. aureus* Cowan (Pansorbin; Calbiochem), 5ng/ml Pokeweed Mitogen (Sigma).

532 **qRT-PCR of CSRnc transcripts:** Total RNA from PBMCs was extracted using TRIzol  
533 (Invitrogen). The integrity of the RNA was measured with Agilent RNA 6000 Nano.  
534 SuperScript™ III One-Step RT-PCR(Invitrogen) was used for reverse transcription and  
535 amplification. Quantitative PCR of CSRnc transcripts for *IGHM*, *IGHG1*, *IGHG3* and AID  
536 gene was performed using specific primers and TaqMan probes(IDT). The primers and  
537 probes used to quantify the CSRnc transcripts are detailed in **Table 3**. Amplification of  
538 *HPRT* with PrimeTime® Predesigned qPCR Assays was performed as the reference gene.  
539 The fold difference was calculated using  $2^{-\Delta\Delta CT}$ , using resting enriched B cells as  
540 calibrator and non-B cells as negative control. *HPRT* was used as normalizer for every  
541 condition.

542 **CSRnc transcription boundaries definition:** Currently, CSRnc transcripts and switch  
543 regions (S) are not mapped as such in the current version of the human genome (GRCh38).  
544 I<sub>H</sub> are upstream of the corresponding switch region (S<sub>H</sub>), thus we first mapped S regions  
545 based on the frequency distribution of the AGCT motif in 500 bp bins along the whole *IGH*  
546 locus (105,583,700 – 105,863,000) [3]. *recount2* is an online resource consisting of  
547 normalized RNA-seq gene and exon counts, as well as coverage *BigWig* files  
548 (<https://jhubiostatistics.shinyapps.io/recount/>) that can be programmatically accessed  
549 through the R programming language [71]. To map I<sub>H</sub>, metadata from all SRA projects  
550 contained in *recount2*, as well as through the SRA-Run selector engine were used to  
551 identify RNA-seq samples and samples performed using purified B cells. The  
552 corresponding *BigWig* files were downloaded using the *recount* Bioconductor package and

553 mapped read counts were visually inspected with Integrative Genomics Viewer [72].  
554 CSRnc regions were delimited according to an expression consensus from projects  
555 described in **Additional file 2: Table S1**.

556 **CSRnc and IGH transcription quantitation:** *recount2* was used to extract read counts  
557 from each of the nine C<sub>H</sub> constant region coding genes (*IGHM*, *IGHD*, *IGHG3*, *IGHG1*,  
558 *IGHA1*, *IGHG2*, *IGHG4*, *IGHE* and *IGHA2*), as well as from the corresponding CSRnc I  
559 exon coordinates as a *GRanges* object [73]. The log<sub>2</sub>-transformed C<sub>H</sub> (coding) and CSRnc  
560 RPKM average per *sample* was used as an approximation of abundance of transcription.  
561 For CSRnc transcription, log<sub>2</sub> RPKM per *sample* average adopted a quasi-normal  
562 distribution with a mean of 2.65 log<sub>2</sub> RPKM (SD ± 3.79), which corresponds to 6.29  
563 RPKM. As an initial exploration to which tissues and in which diseases CSRnc  
564 transcription takes place, we used the log<sub>2</sub> RPKM average as a cut-off to define “high”  
565 expression (> 2.65 log<sub>2</sub> RPKM) or “low” expression (< 2.65 log<sub>2</sub> RPKM). The mean C<sub>H</sub>  
566 transcription average log<sub>2</sub> RPKM was 7.82 (SD± 5.16). Given the difference between  
567 coding and CSRnc transcription, and to address the relative expression between coding and  
568 CSRnc transcription for each Ig loci, coding and CSRnc log<sub>2</sub>RPKM values for each Ig gene  
569 were standardized by transformation to Z-scores.

570 **SRA RNA-seq samples Ontology mapping:** Although all RNA-seq samples in TCGA and  
571 GTEx follow a homogeneous ontology categorization, metadata associated to SRA projects  
572 is widely heterogeneous and commonly insufficient. To obtain a more homogenous  
573 categorization of nearly half of our dataset, we used disease [33] annotations retrieved from  
574 MetaSRA, version 1-2 [74].

575 **Enrichment test:** To define CSRnc transcription profile variation in healthy tissue (GTEx  
576 dataset), we performed tissue sample enrichment analysis according to Z-cluster using a  
577 two sided Fisher’s Exact Test. The H<sub>0</sub> is that there is no difference in the probability  
578 distribution between Z clusters and tissue. A 2 x 2 contingency table was built for each  
579 tissue between the number of samples belonging to a given Z cluster and the remaining  
580 samples not belonging to that cluster. A two-sided Fisher’s test was performed with the R  
581 function `fisher.test(c, alternative = “two.sided”)`. P value adjustment with the Benjamini-  
582 Hochberg method was performed to correct for multiple testing using the R function `p`.

583 `adjust(p, method = "bh", n = length(p))`. A False Discovery Rate (FDR) < 0.01 was  
584 considered as a significant enrichment.

585 **CSRnc transcription profile clustering:** To define CSRnc transcription profiles, Z-scores  
586 for each I-exon were subjected to *k*-means clustering using the Cluster software 3.0 [75].  
587 Ten clusters were generated, with 100 iterative runs and Euclidean distance as distance  
588 metric. Clustered data was visualized with java Treeview 3.0  
589 (<https://sourceforge.net/projects/jtreeview/>).

590 **Differential expression analysis:** Differential expression of coding IGH and CSRnc  
591 transcripts was analyzed using the functions `lmFit()` and `eBayes()` from the *limma* R  
592 package v3.34 [76]. If technical replicates were present for a given study, the induced  
593 correlation was adjusted for using the `duplicationCorrelation()` function from *limma*. The  
594 resulting Bonferroni-adjusted p-values less than 0.05 were determined to be statistically  
595 significant. We used Bonferroni instead of FDR given that we tested 10 regions instead of  
596 the usual number of thousands of genes.

597

598 **Tables:**

| <b>Table 1. Mapping I exons (I<sub>H</sub>) and switch regions (S) in human chromosome 14.GRCh38.p10</b> |              |             |                    |
|----------------------------------------------------------------------------------------------------------|--------------|-------------|--------------------|
| <b>Gene</b>                                                                                              | <b>Start</b> | <b>End</b>  | <b>Length (bp)</b> |
| <b><i>IGHM</i></b>                                                                                       |              |             |                    |
| I $\mu$                                                                                                  | 105,861,311  | 105,862,213 | 903                |
| S $\mu$                                                                                                  | 105,856,501  | 105,860,500 | 4,000              |
| <b><i>IGHD</i></b>                                                                                       |              |             |                    |
| I $\delta$                                                                                               | 105,847,549  | 105,847,857 | 309                |
| <b><i>IGHG3</i></b>                                                                                      |              |             |                    |
| I $\gamma_3$                                                                                             | 105,775,023  | 105,775,702 | 680                |
| S $\gamma_3$                                                                                             | 105,773,001  | 105,774,000 | 1,000              |
| <b><i>IGHG1</i></b>                                                                                      |              |             |                    |
| I $\gamma_1$                                                                                             | 105,747,322  | 105,748,299 | 978                |
| S $\gamma_1$                                                                                             | 105,744,501  | 105,745,500 | 1,000              |
| <b><i>IGHA1</i></b>                                                                                      |              |             |                    |
| I $\alpha_{1.2}$                                                                                         | 105,711,304  | 105,711,907 | 604                |
| I $\alpha_{1.1}$                                                                                         | 105,712,639  | 105,712,892 | 254                |
| S $\alpha_1$                                                                                             | 105,709,501  | 105,712,500 | 3,000              |
| <b><i>IGHG2</i></b>                                                                                      |              |             |                    |
| I $\gamma_2$                                                                                             | 105,647,803  | 105,648,549 | 747                |
| S $\gamma_2$                                                                                             | 105,627,501  | 105,628,500 | 1,000              |
| <b><i>IGHG4</i></b>                                                                                      |              |             |                    |
| I $\gamma_4$                                                                                             | 105,629,000  | 105,629,500 | 501                |
| S $\gamma_4$                                                                                             | 105,623,001  | 105,624,000 | 1,000              |
| <b><i>IGHE</i></b>                                                                                       |              |             |                    |
| I $\epsilon$                                                                                             | 105,605,036  | 105,605,357 | 322                |
| S $\epsilon$                                                                                             | 105,602,501  | 105,604,500 | 2,000              |
| <b><i>IGHA2</i></b>                                                                                      |              |             |                    |
| I $\alpha_2$                                                                                             | 105,589,300  | 105,590,300 | 1,001              |
| S $\alpha_2$                                                                                             | 105,589,001  | 105,591,500 | 2,500              |

599

600

**Table 2. General sequencing run metrics used for CSR-ncRNA  
expression analysis**

|                  | <b>log<sub>2</sub>RPKM</b> | <b>Samples</b> | <b>(%)</b>   |
|------------------|----------------------------|----------------|--------------|
| Total            | NA                         | 70,603         | <b>100.0</b> |
| Highly expressed | > 2.65                     | 21,017         | <b>29.8</b>  |
| Low-expressed    | < 2.6, > 0                 | 23,074         | <b>32.1</b>  |
| Not expressed    | 0                          | 26,512         | <b>37.1</b>  |
| Clustering set   | > 0                        | 44,091         | <b>62.9</b>  |

601

602

603

**Table 3. Oligonucleotides used for qRT-PCR of I $\mu$ , I $\gamma_3$  and I $\gamma_1$**

|              | <b>Forward</b>        | <b>Reverse</b>         | <b>Probe</b>                         |
|--------------|-----------------------|------------------------|--------------------------------------|
| I $\gamma_1$ | CAAGCCCCTCCGTTAC      | ACGAGGAACATGACTGGATG   | 5-F/AGGAGGCAG/Z/CAGAGCGAGG/3IB<br>5- |
| I $\gamma_3$ | CCTGTTGTGGCGAGGTACA   | TTAGTGTTTGCAGCGTGGAG   | F/CTGTCAGCT/Z/GCCACTTGTCTTCCT/3IB    |
| I $\mu$      | CCAGGTGTTGTTTTGCTCAGT | CACTTCTGGTTGTGAAGAGGTG | UPL_ROCHE#61                         |
| AID          | TGGACACCACTATGGACAGC  | GCGGACATTTTTGAATTGGT   | UPL_ROCHE#69                         |

F= FAM; Z = ZEN; IB = Iowa Black

604

605



606 **Figure Legends:**

607 **Figure 1. CSRnc transcription boundaries definition.** Selected projects using isolated B  
608 cells were used to define the limits of CSRnc transcription in human chromosome 14 (See  
609 **Additional file 2: Table S1**). The telomeric region is towards the right. *BigWig* files were  
610 downloaded using *recount2* and visualized using IGV [75] to inspect to determine the  
611 boundaries for each CSRnc transcript. **A**) Coverage graph of project SRP045500 showing  
612 the CRIP1 locus (*left panel*) and the *IGHM* locus (*right panel*) in B (*red track*) and non-B  
613 cells. The CRIP1 gene is transcribed in B and non-B cells, whereas *IGHM* and  $I_{\mu}$  (within  
614 black vertical lines) is transcribed only in B cells and in peripheral blood (*Black track*).  
615 Predicted  $S_{\mu}$  region is shown in the bottom track (*blue*) and annotated genes (GenCode  
616 V24) are shown in *green*. **B**) A view of the *IGHM* – *IGHD* intron locus displaying coverage  
617 graphs from normal purified naive tonsillar (SRP021509, blue track) and peripheral blood  
618 CD19<sup>+</sup> B cells (SRP060715, red track). The vertical black arrow shows  $I_{\delta}$ . *IGHD*  
619 annotation GenCode V24 is shown in *green*. The  $I_{\delta}$  exon overlaps with the  $S_{\mu}$  region [22,  
620 43, 45] and is centromeric regarding the mapped sites for  $\mu$  –  $\delta$  CSR junctions (Dotted  
621 black arrows) [43]. Antisense primer (18156) used by Kluin *et al.* [43] and Arpin, *et al.*  
622 (P4) [45] are shown in purple and green, respectively. The  $S_{\delta}$  Sense primer used by Chen,  
623 *et al.* [44] is shown in orange. The *blue asterisks* indicate *Hind* III sites [22, 23, 43]. **C**)  
624 Transcriptional landscape of the *IGHA1* locus displaying coverage graphs of the *IGHA1*,  
625 GenCode V24 annotation (*green track*), tonsillar naive (SRR834982, blue) and peripheral  
626 blood B cells (SRR2097501, red). Both  $I_{\alpha 1.1}$  and  $I_{\alpha 1.2}$  transcripts are shown. The  $S_{\alpha 1}$  region  
627 (*black bar*) is shown.

628 **Figure 2. CSRnc transcripts quantitation *in vitro* and in vaccination.** A qPCR Taq-Man  
629 assay for  $I_{\mu}$ ,  $I_{\gamma 3}$   $I_{\gamma 1}$  and AID was used to quantitate CSRnc transcription with the  $2^{-\Delta\Delta Ct}$   
630 method ( $\log_2$ ). **A-D**) Enriched B cells cultured for 3 and 6 days with T-dependent like  
631 activation (IL-21,  $\alpha$ -CD40 and CpG) and T-independent activation (PWM, SAC and CpG).  
632 Bar plots represent the mean fold-change (non-activated enriched B cells /activated B cells)  
633 of two independent experiments. Non-B cells were used as control. **E-H**) qPCR Taq-Man  
634 assay for  $I_{\mu}$ ,  $I_{\gamma 3}$   $I_{\gamma 1}$  and AID from total RNA obtained from donors' PBMCs taken at pre-  
635 immunization (day 0) against Hepatitis B and/or Tetanus-Diphtheria and on days 7 and 14

636 post-immunization. (Wilcoxon test.  $p < 0.05$ ). **I**) Plasmablast ( $CD3^+CD19^+CD20^-$   
637  $CD27^+CD38^+$ ) mobilization in peripheral blood expressed as a percentage of  $CD19^+$  B cells  
638 (Wilcoxon test.  $p = 0.005$ ). **J**) Positive correlation between day 0/7 plasmablast ratio and  
639 day 0/7  $I_{\mu}$  ratio (LTS regression method. Adjusted  $R^2$ : 0.53, p-value: 0.015). **K**) Negative  
640 correlation between day 0/7 plasmablast ratio and day 0/14  $I_{\gamma 3}$  ratio (LTS regression  
641 method. Adjusted  $R^2 = 0.63$ , p-value: 0.011). **L-O**) No significant changes in CSRnc  
642 transcription assessed by qPCR were observed 7 and 14 days after trivalent inactivated  
643 Influenza vaccination (Wilcoxon test.  $P > 0.05$ ). **L**)  $I_{\mu}$ , **M**)  $I_{\gamma 3}$ , **N**)  $I_{\gamma 1}$  and **O**) AID. Dotted  
644 red line indicates no change in expression (Fold-change = 1.0).

645 **Figure 3. Quantitative analysis of CSRnc transcription using *recount2*.** **A**) Average  
646  $\log_2$ -transformed RPKM distribution of the 10  $I_H$  exons per sample. There were 44,091  
647 samples with non-zero RPKM. Higher than the mean ( $\log_2\text{RPKM} > 2.65$ ) was considered  
648 “highly” transcribed (shown in red). “Low” CSRnc transcription was defined as a mean  
649  $\log_2$  RPKM  $< 2.65$  (green). **B**) CSRnc transcription profiling by Z-score clustering.  
650  $\log_2\text{RPKM}$  CSRnc transcription values of GTEx + TCGA + SRA datasets were  
651 transformed to standardized Z-scores and subjected to  $k$ -means clustering with a predefined  
652 number of 10 clusters (*Left panel*). Clustered data is represented in a heatmap where  $I_H$ 's  
653 are columns and Z clusters are in rows. Negative Z-scores (i.e.  $< 2.65 \log_2\text{RPKM}$ ) are  
654 shown in green, positive Z-scores (i.e.  $> 2.65 \log_2\text{RPKM}$ ) are shown in red. Absent values  
655 (RPKM = 0) are shown in grey. Z values near 0 are shown in black. The pattern expression  
656 of each cluster is represented in boxplots in **Additional file 1: Figure S6**.

657 **Figure 4. CSRnc transcription in healthy adult tissues.** The GTEx dataset was  
658 partitioned according to tissue type. Violin plot of average  $\log_2\text{RPKM}$  distribution of GTEx  
659 project representative tissues, ordered from left to right according to each tissue median  
660  $\log_2\text{RPKM}$ . The violin area was scaled according to sample count and median and quartiles  
661 are shown. A dotted black line marks the mean average  $\log_2\text{RPKM}$  (2.65). For simplicity,  
662 only brain cortex was included as a representative sample for central nervous system.

663 **Figure 5. Regression analysis of CSRnc transcription as a function of tissue type and**  
664 **I-exon.** Whole blood CSRnc transcription was used as reference tissue (*rows*) for  
665 regression analysis according to I-exon (*columns*). The estimate for each comparison is

666 expressed as a heatmap. Higher CSRnc transcription than in blood is represented in blue  
667 tones, whereas lower transcription is shown in pink tones. Zero estimate values are shown  
668 in ivory. Missing values (NA's) are shown in white. Euclidian distance was used for  
669 hierarchical clustering by row.

670 **Figure 6. CSRnc transcription profile variation in healthy tissue.** The GTEX dataset  
671 was categorized according to tissue ( $x$  axis) and the relative proportion of samples ( $y$ -axis)  
672 belonging to each  $Z$  cluster (in *colors*). Many central nervous system tissues with highly  
673 similar pattern were removed for simplicity. Proportions were hierarchically clustered using  
674 Pearson correlation as distance metric with Cluster3.0 [75]. The red dotted line marks a  
675 correlation  $R^2 = 0.7$ . The black asterisk indicates a significant enrichment of a given tissue  
676 in a particular  $Z$  cluster (Exact Fisher's test, Benjamini-Hochberg adjustment for multiple  
677 correction. FDR < 0.01).

678 **Figure 7. CSRnc  $I_H$  and  $C_H$  transcription in fetal tissues.** Heatmap of  $Z$ -score average  
679 per tissue ( $n = 3-8$ ) of  $I_H$  and  $C_H$  (*columns*) in 9-22 weeks of gestation fetal tissues (*rows*).  
680 Higher transcription ( $Z$ -scores) are shown in green-yellow, lower expression and no  
681 expression is shown in purple and gray, respectively. Higher than average expression of  $I_{\gamma 4}$   
682 is observed in all tested tissues. Data from this figure was obtained from study SRP055513  
683 [31].

684 **Figure 8. CSRnc transcription in cancer.** RNA-seq data from the TCGA project was  
685 used to analyze CSRnc transcription in 33 cancer types. Violin plots of average  $\log_2$ RPKM,  
686 ordered from left to right according to increasing median. Violin area is scaled to each  
687 tumor sample count. A dotted black line marks the average  $\log_2$ RPKM = 2.65.

688 **Figure 9. Comparison of CSRnc transcription in healthy tissue and its tumoral  
689 counterpart.** Violin plots of the average  $\log_2$ RPKM distribution in healthy tissue (*blue*) in  
690 comparison with its cancer tissue counterpart (*purple*). Violin area are not scaled to sample  
691 count. Median (*black dot*) and quartiles are shown for each violin. Dashed black line marks  
692 the mean average  $\log_2$ RPKM (2.65). A reduction of CSRnc transcription in tumors was  
693 observed in **A-E**. An increase of CSRnc transcription in tumors vs. healthy tissue was  
694 observed in **G-K**. Some types of kidney cancers and melanomas showed an opposite  
695 patterns regarding the healthy tissue counterpart (**F** and **L**). The conducted statistical test

696 were Wilcoxon rank sum test with continuity correction for two-sample comparisons, and  
697 Kruskal-Wallis test with *post hoc* Dunn's test correction for multiple comparisons.

698 **Figure 10. Increased  $I_{\delta}$  transcription in ileal mucosa of Crohn's disease.** Pediatric  
699 Crohn's disease patients from project SRP042228 were classified in two groups according  
700 to ileal mucosa involvement (iCD) on non-involvement (cCD) [37]. Patients were further  
701 classified according to the degree of ileal mucosa inflammation. Ileal mucosa from non-  
702 inflammatory bowel disease (not-IBD) and ulcerative colitis (UC) were used as controls  
703 [37]. **A)** Boxplot showing increased  $I_{\delta}$  transcription (RPKM, *y axis*) in deep ulcerated  
704 Crohn's disease with ileal involvement (one factor ANOVA, Tukey multiple comparisons  
705 of means.  $P < 0.005$ ). **B)** Transcriptional landscape of the *IGHD-IGHM* locus in human  
706 chromosome 14 showing increased  $I_{\delta}$  transcription in representative samples of deep  
707 ulcerated iCD (*red track*), cCD with microscopic inflammation (*blue track*), iCD with  
708 macroscopic inflammation (*purple track*), non-IBD (*black track*) and UC (*orange track*).

## 709 **Additional files**

710 **Additional file 1: Figure S1**, Distribution of the number of samples per RNA-seq project  
711 analyzed. **Figure S2**, CSRnc transcription is B cells-specific. **Figure S3**, CSRnc  
712 transcription pattern in whole blood is similar to peripheral blood sorted CD19<sup>+</sup> B cells.  
713 **Figure S4**, Epigenetic marks in  $I_{\delta}$ . **Figure S5**, CSRnc transcription according to  $I_H$  and  
714 project dataset. Figure S6, CSRnc transcriptional profiles identified by *k*-means clustering  
715 of the recount2 dataset **Figure S7**, Correlation between CSRnc  $I_H$  transcription and coding  
716  $C_H$  transcription. **Figure S8**, CSRnc and  $C_H$  coding transcription in Bone marrow lymphoid  
717 precursors. **Figure S9**, CSRnc and  $C_H$  coding transcription in thymic lymphoid precursors.  
718 **Figure S10**, Comparison of CSRnc transcription in healthy tissue and its tumor counterpart  
719 (PDF).

720 **Additional file 2: Table S1**, Selected SRA projects used to map  $I_H$  boundaries. **Table S2**,  
721 CSRnc transcription analysis in cancer cell lines. **Table S3**, Differential expression analysis  
722 in  $I_H$  and  $C_H$ . (XLSX).

723

724

725

726

## 727 **Ethics approval and consent to participate**

728 The participants in this study did so voluntarily after written consent. The study was  
729 approved by the INSP Institutional Review Board (CI: 971/82-6684).

## 730 **Competing interest**

731 The authors declare that they have no competing interests.

## 732 **Acknowledgements**

733 We would like to thank Analí Migueles and Everardo Millan for their support in data pre-  
734 processing, and Fernando Riveros Mackay for differential expression analysis; Leopoldo  
735 Santos-Argumedo for kindly donating  $\alpha$ CD40 hybridoma G28.5), Martha Patricia Rojo for  
736 support on flow cytometry; Tomás Salmerón Enciso, Yvonne Rosenstein, Fernando  
737 Esquivel and José Moreno for academic input, and Menno Van Zelm for critically  
738 reviewing the manuscript. HKM is a PhD student of Programa de Doctorado en Ciencias  
739 Biomédicas, UNAM, and was supported by a CONACyT scholarship.

## 740 **Abbreviations**

741 AID: Activated-Induced Cytidine Deaminase; CD: Crohn's disease; CSRnc: Class Switch  
742 Recombination non-coding; CSR: Class Switch Recombination; CG: Germinal Center; C<sub>H</sub>:  
743 Heavy chain Constant; ELS: Ectopic Lymphoid Structures; EBV: Epstein Barr Virus;  
744 GTE<sub>x</sub>: Genotype-Tissue Expression Project; I<sub>H</sub>: I exon; MALT: Mucosal Associated  
745 lymphoid Tissue; PAMP: Pathogen-Associated Molecular Pattern; PB: Peripheral blood;  
746 SRA: Sequence Read Archive; RPKM: Reads Per Kilobase (transcript) Per Million (reads);  
747 TCGA: The Cancer Genome Atlas.

## 748 **Funding:**

749 This research was funded by the Consejo Nacional de Ciencia y Tecnología (CONACyT)  
750 /Fondo Sectorial de Investigación en Salud y Seguridad Social (FOSISSS) grant # 142120;

751 HKM is a PhD student of Programa de Doctorado en Ciencias Biomédicas, UNAM, and  
752 was supported by a CONACyT scholarship.

### 753 **Authors' contributions**

754 This study was conceived and designed by HKM and JMB. The experimental procedures  
755 were performed by HKM, MOM, HVT and JMTS. Flow cytometry acquisition and analysis  
756 was conducted by HKM and LBA. RNA-seq data bioinformatics and statistical analysis  
757 were done by HKM, LCT and JMB, and supervised by AJ. HKM and JMB drafted the  
758 manuscript. LBA, LCT and AJ critically reviewed the manuscript. All authors read and  
759 approved the final manuscript.

### 760 **References:**

- 761 1. Victora GD, Nussenzweig MC: **Germinal centers.** *Annu Rev Immunol* 2012, **30**:429-457.
- 762 2. Taketoshi Yoshida HM, Thomas Dorner, Falk Hiepe, Andreas Radbruch, Simon Fillatreau,  
763 Bimba F. Hoyer: **Memory B and memory plasma cells.** *Immunological Reviews* 2010,  
764 **237**:117-139.
- 765 3. Xu Z, Zan H, Pone EJ, Mai T, Casali P: **Immunoglobulin class-switch DNA**  
766 **recombination: induction, targeting and beyond.** *Nat Rev Immunol* 2012, **12**:517-531.
- 767 4. Lorenz M, Jung S, Radbruch A: **Switch transcripts in immunoglobulin class switching.**  
768 *Science* 1995, **267**:1825-1828.
- 769 5. Chowdhury M, Forouhi O, Dayal S, McCloskey N, Gould HJ, Felsenfeld G, Fear DJ:  
770 **Analysis of intergenic transcription and histone modification across the human**  
771 **immunoglobulin heavy-chain locus.** *Proc Natl Acad Sci U S A* 2008, **105**:15872-15877.
- 772 6. Yewdell WT, Chaudhuri J: **A transcriptional serenaID: the role of noncoding RNAs in**  
773 **class switch recombination.** *Int Immunol* 2017, **29**:183-196.
- 774 7. Alt FW, Zhang Y, Meng FL, Guo C, Schwer B: **Mechanisms of programmed DNA**  
775 **lesions and genomic instability in the immune system.** *Cell* 2013, **152**:417-429.
- 776 8. Consortium GT: **The Genotype-Tissue Expression (GTEx) project.** *Nat Genet* 2013,  
777 **45**:580-585.
- 778 9. Consortium GT, Laboratory DA, Coordinating Center -Analysis Working G, Statistical  
779 Methods groups-Analysis Working G, Enhancing Gg, Fund NIHC, Nih/Nci, Nih/Nhgri,  
780 Nih/Nimh, Nih/Nida, et al: **Genetic effects on gene expression across human tissues.**  
781 *Nature* 2017, **550**:204-213.
- 782 10. Cancer Genome Atlas Research N, Weinstein JN, Collisson EA, Mills GB, Shaw KR,  
783 Ozenberger BA, Ellrott K, Shmulevich I, Sander C, Stuart JM: **The Cancer Genome Atlas**  
784 **Pan-Cancer analysis project.** *Nat Genet* 2013, **45**:1113-1120.
- 785 11. Hoadley KA, Yau C, Hinoue T, Wolf DM, Lazar AJ, Drill E, Shen R, Taylor AM,  
786 Cherniack AD, Thorsson V, et al: **Cell-of-Origin Patterns Dominate the Molecular**  
787 **Classification of 10,000 Tumors from 33 Types of Cancer.** *Cell* 2018, **173**:291-304 e296.
- 788 12. Collado-Torres L, Nellore A, Kammers K, Ellis SE, Taub MA, Hansen KD, Jaffe AE,  
789 Langmead B, Leek JT: **Reproducible RNA-seq analysis using recount2.** *Nat Biotechnol*  
790 2017, **35**:319-321.

- 791 13. Litinskiy MB, Nardelli B, Hilbert DM, He B, Schaffer A, Casali P, Cerutti A: **DCs induce**  
792 **CD40-independent immunoglobulin class switching through BLyS and APRIL.** *Nat*  
793 *Immunol* 2002, **3**:822-829.
- 794 14. Fear DJ, McCloskey N, O'Connor B, Felsenfeld G, Gould HJ: **Transcription of Ig**  
795 **Germline Genes in Single Human B Cells and the Role of Cytokines in Isotype**  
796 **Determination.** *The Journal of Immunology* 2004, **173**:4529-4538.
- 797 15. Henn AD, Wu S, Qiu X, Ruda M, Stover M, Yang H, Liu Z, Welle SL, Holden-Wiltse J,  
798 Wu H, Zand MS: **High-resolution temporal response patterns to influenza vaccine**  
799 **reveal a distinct human plasma cell gene signature.** *Sci Rep* 2013, **3**:2327.
- 800 16. Beguelin W, Popovic R, Teater M, Jiang Y, Bunting KL, Rosen M, Shen H, Yang SN,  
801 Wang L, Ezponda T, et al: **EZH2 is required for germinal center formation and somatic**  
802 **EZH2 mutations promote lymphoid transformation.** *Cancer Cell* 2013, **23**:677-692.
- 803 17. Pascual M, Roa S, Garcia-Sanchez A, Sanz C, Hernandez-Hernandez L, Grealley JM,  
804 Lorente F, Davila I, Isidoro-Garcia M: **Genome-wide expression profiling of B**  
805 **lymphocytes reveals IL4R increase in allergic asthma.** *J Allergy Clin Immunol* 2014,  
806 **134**:972-975.
- 807 18. Linsley PS, Speake C, Whalen E, Chaussabel D: **Copy number loss of the interferon gene**  
808 **cluster in melanomas is linked to reduced T cell infiltrate and poor patient prognosis.**  
809 *PLoS One* 2014, **9**:e109760.
- 810 19. Koues OI, Kowalewski RA, Chang LW, Pyfrom SC, Schmidt JA, Luo H, Sandoval LE,  
811 Hughes TB, Bednarski JJ, Cashen AF, et al: **Enhancer sequence variants and**  
812 **transcription-factor deregulation synergize to construct pathogenic regulatory circuits**  
813 **in B-cell lymphoma.** *Immunity* 2015, **42**:186-198.
- 814 20. Hoek KL, Samir P, Howard LM, Niu X, Prasad N, Galassie A, Liu Q, Allos TM, Floyd  
815 KA, Guo Y, et al: **A cell-based systems biology assessment of human blood to monitor**  
816 **immune responses after influenza vaccination.** *PLoS One* 2015, **10**:e0118528.
- 817 21. Kushwaha G, Dozmorov M, Wren JD, Qiu J, Shi H, Xu D: **Hypomethylation coordinates**  
818 **antagonistically with hypermethylation in cancer development: a case study of**  
819 **leukemia.** *Hum Genomics* 2016, **10 Suppl 2**:18.
- 820 22. Akahori Y, Handa H, Imai K, Abe M, Kameyama K, Hibiya M, Yasui H, Okamura K,  
821 Naito M, Matsuoka H, et al.: **Sigma region located between C mu and C delta genes of**  
822 **human immunoglobulin heavy chain: possible involvement of tRNA-like structure in**  
823 **RNA splicing.** *Nucleic Acids Res* 1988, **16**:9497-9511.
- 824 23. Yasui H, Akahori Y, Hirano M, Yamada K, Kurosawa Y: **Class switch from mu to delta**  
825 **is mediated by homologous recombination between sigma mu and sigma mu sequences**  
826 **in human immunoglobulin gene loci.** *Eur J Immunol* 1989, **19**:1399-1403.
- 827 24. Zerbino DR, Achuthan P, Akanni W, Amode MR, Barrell D, Bhai J, Billis K, Cummins C,  
828 Gall A, Giron CG, et al: **Ensembl 2018.** *Nucleic Acids Res* 2018, **46**:D754-D761.
- 829 25. Roadmap Epigenomics C, Kundaje A, Meuleman W, Ernst J, Bilenky M, Yen A, Heravi-  
830 Moussavi A, Kheradpour P, Zhang Z, Wang J, et al: **Integrative analysis of 111 reference**  
831 **human epigenomes.** *Nature* 2015, **518**:317-330.
- 832 26. Consortium EP: **An integrated encyclopedia of DNA elements in the human genome.**  
833 *Nature* 2012, **489**:57-74.
- 834 27. Wrammert J, Smith K, Miller J, Langley WA, Kokko K, Larsen C, Zheng NY, Mays I,  
835 Garman L, Helms C, et al: **Rapid cloning of high-affinity human monoclonal antibodies**  
836 **against influenza virus.** *Nature* 2008, **453**:667-671.
- 837 28. Odendahl M, Mei H, Hoyer BF, Jacobi AM, Hansen A, Muehlinghaus G, Berek C, Hiepe  
838 F, Manz R, Radbruch A, Dorner T: **Generation of migratory antigen-specific plasma**  
839 **blasts and mobilization of resident plasma cells in a secondary immune response.**  
840 *Blood* 2005, **105**:1614-1621.

- 841 29. Frolich D, Giesecke C, Mei HE, Reiter K, Daridon C, Lipsky PE, Dorner T: **Secondary**  
842 **immunization generates clonally related antigen-specific plasma cells and memory B**  
843 **cells.** *J Immunol* 2010, **185**:3103-3110.
- 844 30. Casero D, Sandoval S, Seet CS, Scholes J, Zhu Y, Ha VL, Luong A, Parekh C, Crooks GM:  
845 **Long non-coding RNA profiling of human lymphoid progenitor cells reveals**  
846 **transcriptional divergence of B cell and T cell lineages.** *Nat Immunol* 2015, **16**:1282-  
847 1291.
- 848 31. Roost MS, van Iperen L, Ariyurek Y, Buermans HP, Arindrarto W, Devalla HD, Passier R,  
849 Mummery CL, Carlotti F, de Koning EJ, et al: **KeyGenes, a Tool to Probe Tissue**  
850 **Differentiation Using a Human Fetal Transcriptional Atlas.** *Stem Cell Reports* 2015,  
851 **4**:1112-1124.
- 852 32. Colbeck EJ, Ager A, Gallimore A, Jones GW: **Tertiary Lymphoid Structures in Cancer:**  
853 **Drivers of Antitumor Immunity, Immunosuppression, or Bystander Sentinels in**  
854 **Disease?** *Front Immunol* 2017, **8**:1830.
- 855 33. Kibbe WA, Arze C, Felix V, Mitiraka E, Bolton E, Fu G, Mungall CJ, Binder JX, Malone J,  
856 Vasant D, et al: **Disease Ontology 2015 update: an expanded and updated database of**  
857 **human diseases for linking biomedical knowledge through disease data.** *Nucleic Acids*  
858 *Res* 2015, **43**:D1071-1078.
- 859 34. Tran TM, Jones MB, Ongoiba A, Bijker EM, Schats R, Venepally P, Skinner J, Doumbo S,  
860 Quinten E, Visser LG, et al: **Transcriptomic evidence for modulation of host**  
861 **inflammatory responses during febrile Plasmodium falciparum malaria.** *Sci Rep* 2016,  
862 **6**:31291.
- 863 35. Mei B, Ding X, Xu HZ, Wang MT: **Global gene expression changes in human**  
864 **peripheral blood after H7N9 infection.** *Gene* 2014, **551**:255-260.
- 865 36. Hung T, Pratt GA, Sundararaman B, Townsend MJ, Chaivorapol C, Bhangale T, Graham  
866 RR, Ortmann W, Criswell LA, Yeo GW, Behrens TW: **The Ro60 autoantigen binds**  
867 **endogenous retroelements and regulates inflammatory gene expression.** *Science* 2015,  
868 **350**:455-459.
- 869 37. Haberman Y, Tickle TL, Dexheimer PJ, Kim MO, Tang D, Karns R, Baldassano RN, Noe  
870 JD, Rosh J, Markowitz J, et al: **Pediatric Crohn disease patients exhibit specific ileal**  
871 **transcriptome and microbiome signature.** *J Clin Invest* 2014, **124**:3617-3633.
- 872 38. Kinoshita K, Harigai M, Fagarasan S, Muramatsu M, Honjo T: **A hallmark of active class**  
873 **switch recombination: transcripts directed by I promoters on looped-out circular**  
874 **DNAs.** *Proc Natl Acad Sci U S A* 2001, **98**:12620-12623.
- 875 39. Iwasato T, Shimizu A, Honjo T, Yamagishi H: **Circular DNA is excised by**  
876 **immunoglobulin class switch recombination.** *Cell* 1990, **62**:143-149.
- 877 40. Matsuoka M, Yoshida K, Maeda T, Usuda S, Sakano H: **Switch circular DNA formed in**  
878 **cytokine-treated mouse splenocytes: evidence for intramolecular DNA deletion in**  
879 **immunoglobulin class switching.** *Cell* 1990, **62**:135-142.
- 880 41. von Schwedler U, Jack HM, Wabl M: **Circular DNA is a product of the immunoglobulin**  
881 **class switch rearrangement.** *Nature* 1990, **345**:452-456.
- 882 42. Rouaud P, Saintamand A, Saad F, Carrion C, Lecardeur S, Cogne M, Denizot Y:  
883 **Elucidation of the enigmatic IgD class-switch recombination via germline deletion of**  
884 **the IgH 3' regulatory region.** *J Exp Med* 2014, **211**:975-985.
- 885 43. Kluin PM, Kayano H, Zani VJ, Kluin-Nelemans HC, Tucker PW, Satterwhite E, Dyer MJ:  
886 **IgD class switching: identification of a novel recombination site in neoplastic and**  
887 **normal B cells.** *Eur J Immunol* 1995, **25**:3504-3508.
- 888 44. Chen K, Xu W, Wilson M, He B, Miller NW, Bengten E, Edholm ES, Santini PA, Rath P,  
889 Chiu A, et al: **Immunoglobulin D enhances immune surveillance by activating**  
890 **antimicrobial, proinflammatory and B cell-stimulating programs in basophils.** *Nat*  
891 *Immunol* 2009, **10**:889-898.



- 892 45. Arpin C, de Bouteiller O, Razanajaona D, Fugier-Vivier I, Briere F, Banchereau J,  
893 Lebecque S, Liu YJ: **The normal counterpart of IgD myeloma cells in germinal center**  
894 **displays extensively mutated IgVH gene, Cmu-Cdelta switch, and lambda light chain**  
895 **expression.** *J Exp Med* 1998, **187**:1169-1178.
- 896 46. Guthmiller JJ, Wilson PC: **Harnessing immune history to combat influenza viruses.**  
897 *Curr Opin Immunol* 2018, **53**:187-195.
- 898 47. Li SC, Rothman PB, Zhang J, Chan C, Hirsh D, Alt FW: **Expression of I mu-C gamma**  
899 **hybrid germline transcripts subsequent to immunoglobulin heavy chain class**  
900 **switching.** *Int Immunol* 1994, **6**:491-497.
- 901 48. Bolland DJ, Wood AL, Afshar R, Featherstone K, Oltz EM, Corcoran AE: **Antisense**  
902 **intergenic transcription precedes Igh D-to-J recombination and is controlled by the**  
903 **intronic enhancer Emu.** *Mol Cell Biol* 2007, **27**:5523-5533.
- 904 49. Afshar R, Pierce S, Bolland DJ, Corcoran A, Oltz EM: **Regulation of IgH gene assembly:**  
905 **role of the intronic enhancer and 5'DQ52 region in targeting DHJH recombination.** *J*  
906 *Immunol* 2006, **176**:2439-2447.
- 907 50. Perlot T, Alt FW, Bassing CH, Suh H, Pinaud E: **Elucidation of IgH intronic enhancer**  
908 **functions via germ-line deletion.** *Proc Natl Acad Sci U S A* 2005, **102**:14362-14367.
- 909 51. Winer DA, Winer S, Chng MH, Shen L, Engleman EG: **B Lymphocytes in obesity-related**  
910 **adipose tissue inflammation and insulin resistance.** *Cell Mol Life Sci* 2014, **71**:1033-  
911 1043.
- 912 52. Chen Q, Deng T, Han D: **Testicular immunoregulation and spermatogenesis.** *Semin Cell*  
913 *Dev Biol* 2016, **59**:157-165.
- 914 53. Kolkhir P, Metz M, Altrichter S, Maurer M: **Comorbidity of chronic spontaneous**  
915 **urticaria and autoimmune thyroid diseases: A systematic review.** *Allergy* 2017,  
916 **72**:1440-1460.
- 917 54. Aalberse RC, Stapel SO, Schuurman J, Rispens T: **Immunoglobulin G4: an odd antibody.**  
918 *Clin Exp Allergy* 2009, **39**:469-477.
- 919 55. Jonsson S, Sveinbjornsson G, de Lapuente Portilla AL, Swaminathan B, Plomp R, Dekkers  
920 G, Ajore R, Ali M, Bentlage AEH, Elmer E, et al: **Identification of sequence variants**  
921 **influencing immunoglobulin levels.** *Nat Genet* 2017, **49**:1182-1191.
- 922 56. Pitzalis C, Jones GW, Bombardieri M, Jones SA: **Ectopic lymphoid-like structures in**  
923 **infection, cancer and autoimmunity.** *Nat Rev Immunol* 2014, **14**:447-462.
- 924 57. Germain C, Gnjatich S, Tamzalit F, Knockaert S, Remark R, Goc J, Lepelley A, Becht E,  
925 Katsahian S, Bizouard G, et al: **Presence of B cells in tertiary lymphoid structures is**  
926 **associated with a protective immunity in patients with lung cancer.** *Am J Respir Crit*  
927 *Care Med* 2014, **189**:832-844.
- 928 58. Gu-Trantien C, Loi S, Garaud S, Equeter C, Libin M, de Wind A, Ravoet M, Le Buanec H,  
929 Sibille C, Manfouo-Foutsop G, et al: **CD4(+) follicular helper T cell infiltration predicts**  
930 **breast cancer survival.** *J Clin Invest* 2013, **123**:2873-2892.
- 931 59. Bindea G, Mlecnik B, Tosolini M, Kirilovsky A, Waldner M, Obenauf AC, Angell H,  
932 Fredriksen T, Lafontaine L, Berger A, et al: **Spatiotemporal dynamics of intratumoral**  
933 **immune cells reveal the immune landscape in human cancer.** *Immunity* 2013, **39**:782-  
934 795.
- 935 60. Qian J, Wang Q, Dose M, Pruett N, Kieffer-Kwon KR, Resch W, Liang G, Tang Z, Mathe  
936 E, Benner C, et al: **B cell super-enhancers and regulatory clusters recruit AID**  
937 **tumorigenic activity.** *Cell* 2014, **159**:1524-1537.
- 938 61. Taylor BJ, Nik-Zainal S, Wu YL, Stebbings LA, Raine K, Campbell PJ, Rada C, Stratton  
939 MR, Neuberger MS: **DNA deaminases induce break-associated mutation showers with**  
940 **implication of APOBEC3B and 3A in breast cancer kataegis.** *Elife* 2013, **2**:e00534.
- 941 62. Teng MW, Galon J, Fridman WH, Smyth MJ: **From mice to humans: developments in**  
942 **cancer immunoediting.** *J Clin Invest* 2015, **125**:3338-3346.

- 943 63. Saltz J, Gupta R, Hou L, Kurc T, Singh P, Nguyen V, Samaras D, Shroyer KR, Zhao T,  
944 Batiste R, et al: **Spatial Organization and Molecular Correlation of Tumor-Infiltrating**  
945 **Lymphocytes Using Deep Learning on Pathology Images.** *Cell Rep* 2018, **23**:181-193  
946 e187.
- 947 64. Thorsson V, Gibbs DL, Brown SD, Wolf D, Bortone DS, Ou Yang TH, Porta-Pardo E, Gao  
948 GF, Plaisier CL, Eddy JA, et al: **The Immune Landscape of Cancer.** *Immunity* 2018,  
949 **48**:812-830 e814.
- 950 65. Cianci R, Lolli S, Pagliari D, Gambassi G, Frosali S, Marmo R, Melioli G, Orlando A,  
951 Newton EE, Serone E, et al: **The involvement of IgH enhancer HS1.2 in the**  
952 **pathogenesis of Crohn's disease: how the immune system can influence a**  
953 **multifactorial disease.** *Eur Rev Med Pharmacol Sci* 2016, **20**:3618-3627.
- 954 66. Masters SL, Simon A, Aksentijevich I, Kastner DL: **Horror autoinflammaticus: the**  
955 **molecular pathophysiology of autoinflammatory disease (\*).** *Annu Rev Immunol* 2009,  
956 **27**:621-668.
- 957 67. Koelsch K, Zheng NY, Zhang Q, Duty A, Helms C, Mathias MD, Jared M, Smith K, Capra  
958 JD, Wilson PC: **Mature B cells class switched to IgD are autoreactive in healthy**  
959 **individuals.** *J Clin Invest* 2007, **117**:1558-1565.
- 960 68. Zheng NY, Wilson K, Wang X, Boston A, Kolar G, Jackson SM, Liu YJ, Pascual V, Capra  
961 JD, Wilson PC: **Human immunoglobulin selection associated with class switch and**  
962 **possible tolerogenic origins for C delta class-switched B cells.** *J Clin Invest* 2004,  
963 **113**:1188-1201.
- 964 69. Mannoor K, Xu Y, Chen C: **Natural autoantibodies and associated B cells in immunity**  
965 **and autoimmunity.** *Autoimmunity* 2013, **46**:138-147.
- 966 70. Choi JH, Wang KW, Zhang D, Zhan X, Wang T, Bu CH, Behrendt CL, Zeng M, Wang Y,  
967 Misawa T, et al: **IgD class switching is initiated by microbiota and limited to mucosa-**  
968 **associated lymphoid tissue in mice.** *Proc Natl Acad Sci U S A* 2017, **114**:E1196-E1204.
- 969 71. Team; RC: **R: A Language and Environment for Statistical Computing.** (Computing  
970 RfFS ed.; 2018.
- 971 72. Thorvaldsdottir H, Robinson JT, Mesirov JP: **Integrative Genomics Viewer (IGV): high-**  
972 **performance genomics data visualization and exploration.** *Brief Bioinform* 2013,  
973 **14**:178-192.
- 974 73. Lawrence M, Huber W, Pages H, Aboyoun P, Carlson M, Gentleman R, Morgan MT,  
975 Carey VJ: **Software for computing and annotating genomic ranges.** *PLoS Comput Biol*  
976 2013, **9**:e1003118.
- 977 74. Bernstein MN, Doan A, Dewey CN: **MetaSRA: normalized human sample-specific**  
978 **metadata for the Sequence Read Archive.** *Bioinformatics* 2017, **33**:2914-2923.
- 979 75. de Hoon MJ, Imoto S, Nolan J, Miyano S: **Open source clustering software.**  
980 *Bioinformatics* 2004, **20**:1453-1454.
- 981 76. Ritchie ME, Phipson B, Wu D, Hu Y, Law CW, Shi W, Smyth GK: **limma powers**  
982 **differential expression analyses for RNA-sequencing and microarray studies.** *Nucleic*  
983 *Acids Res* 2015, **43**:e47.

**A**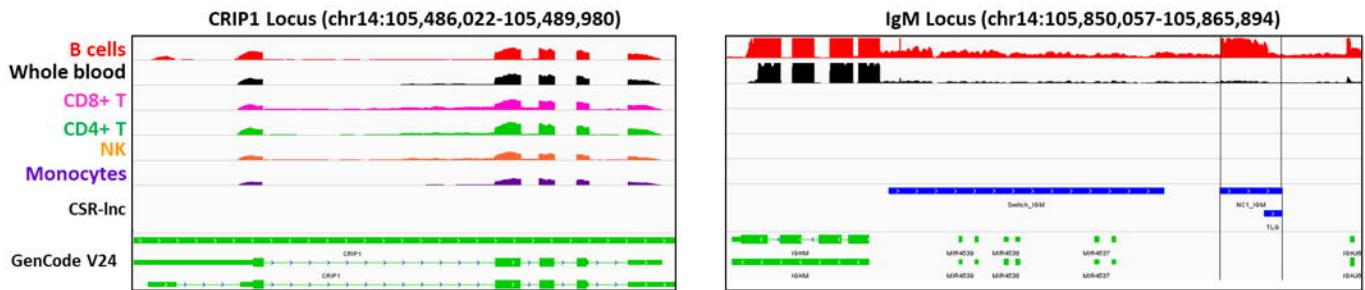**B**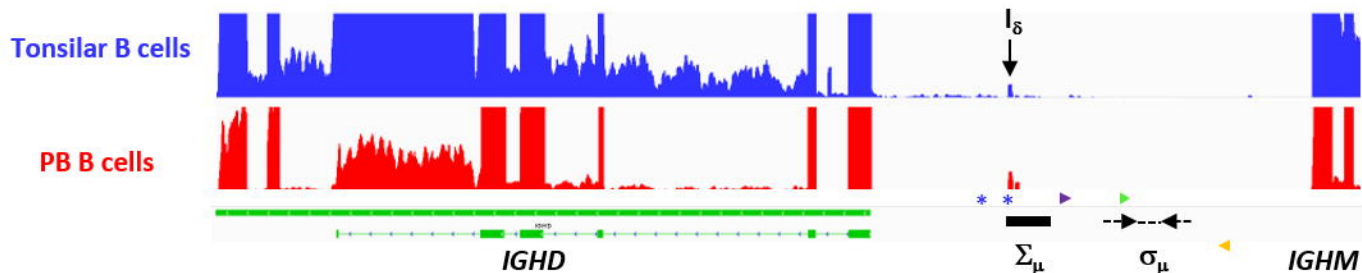**C**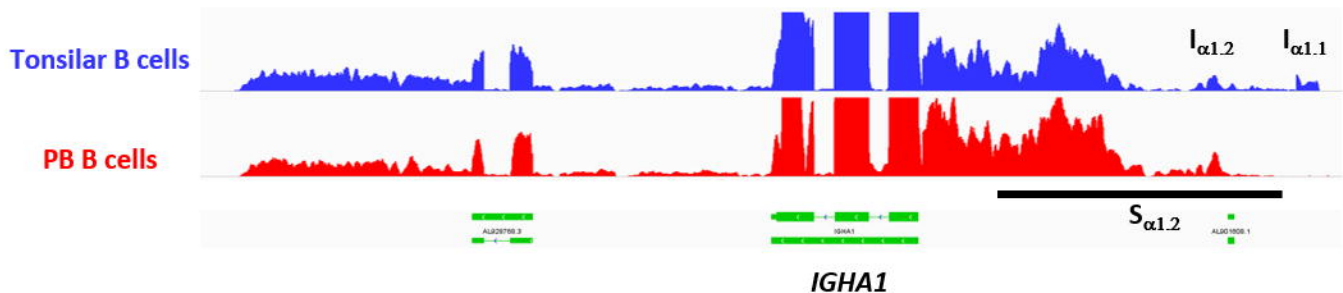

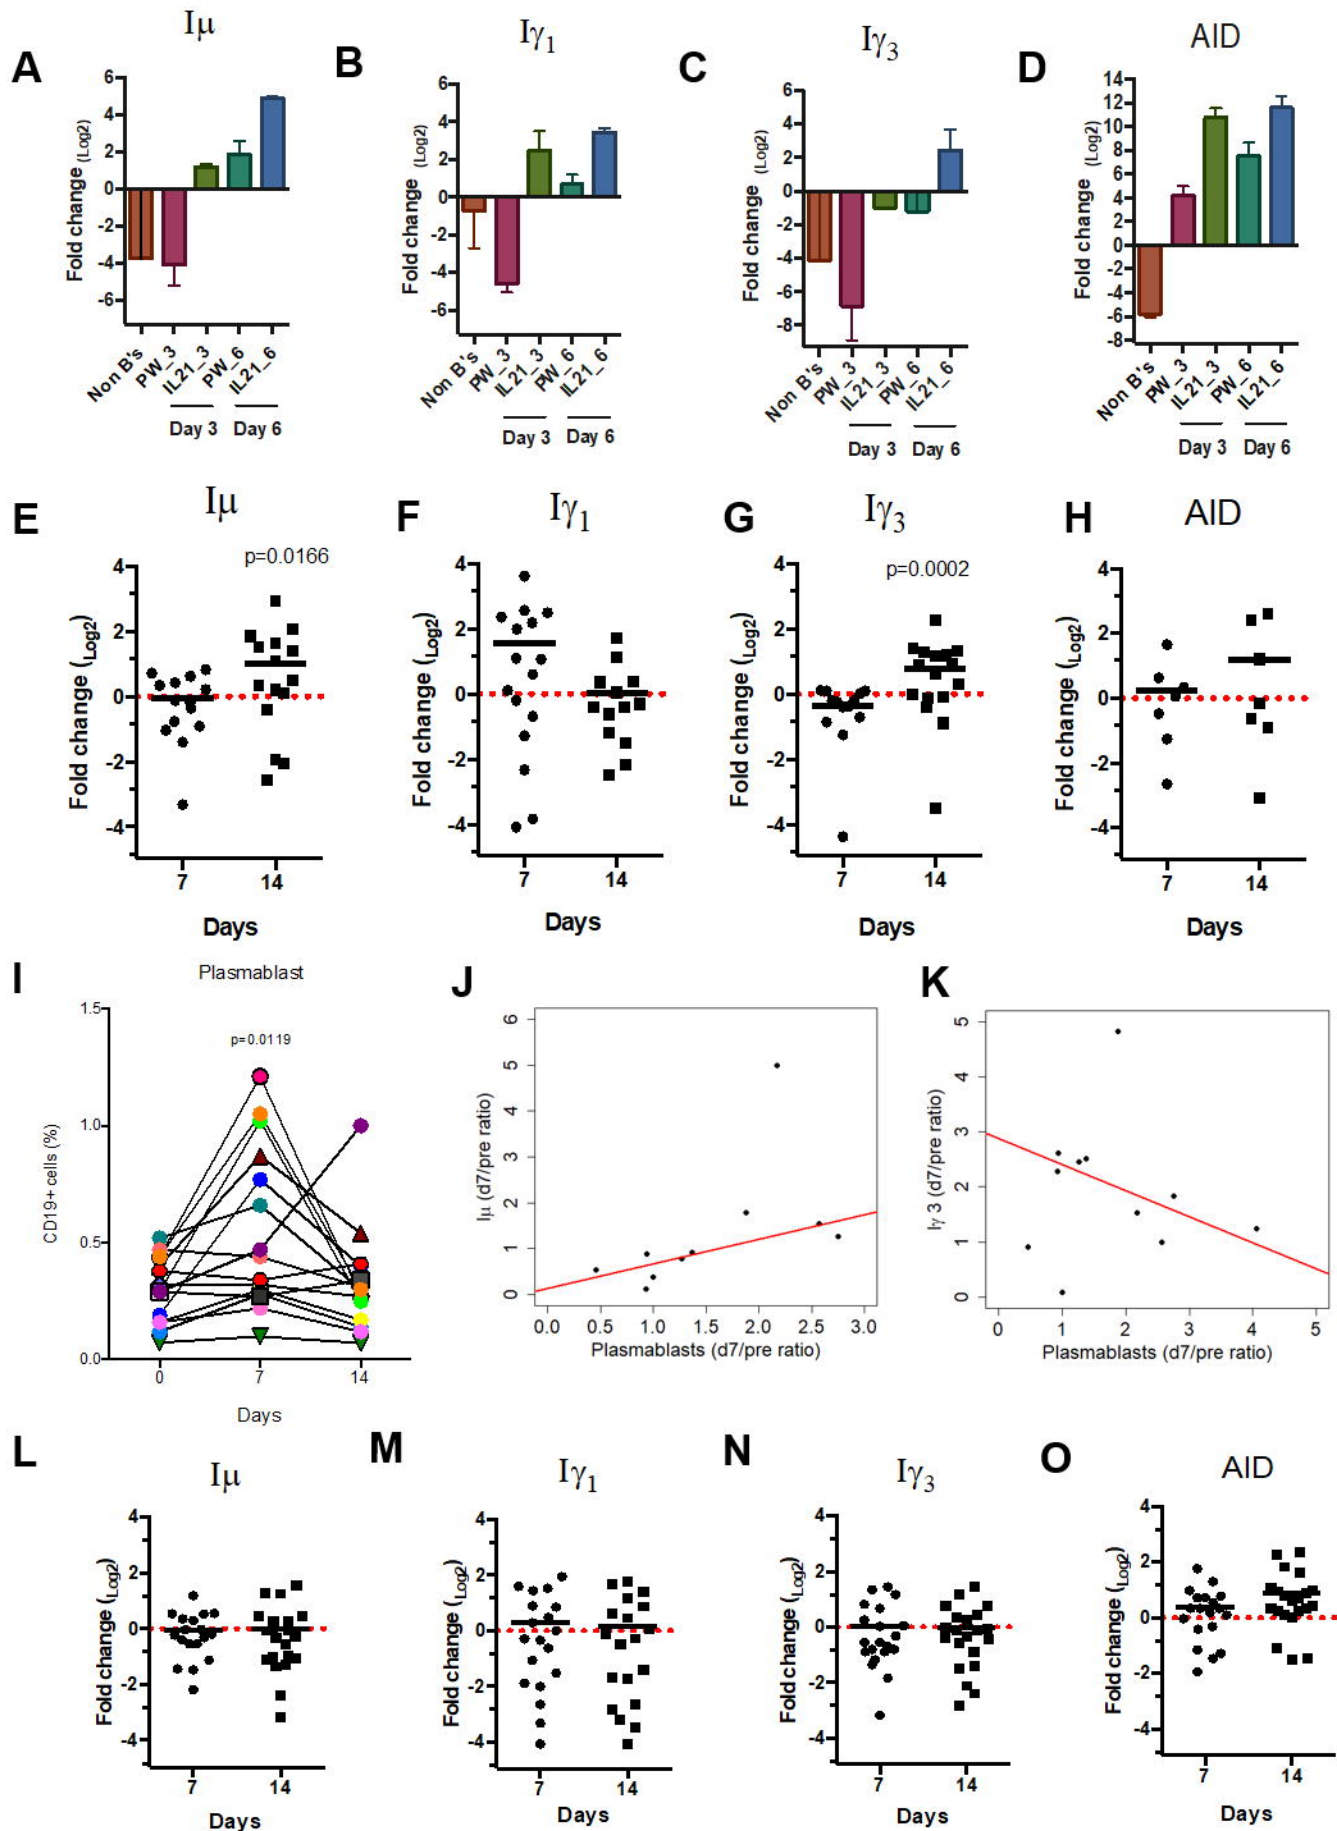

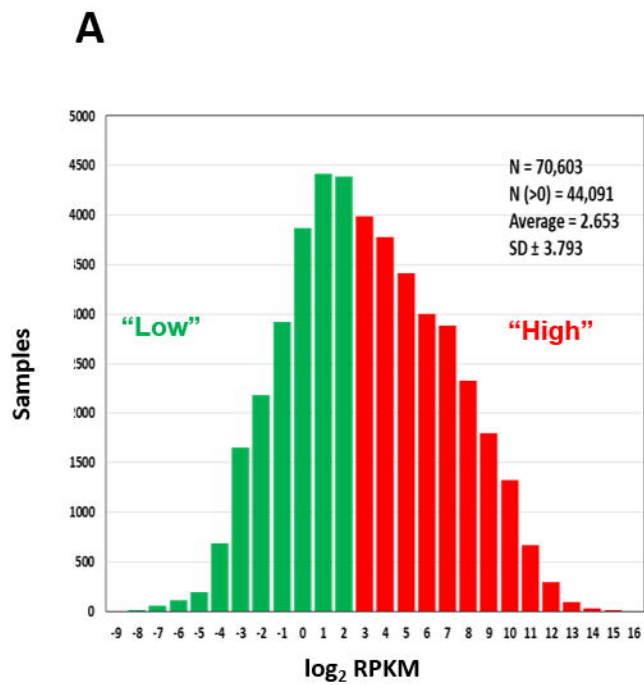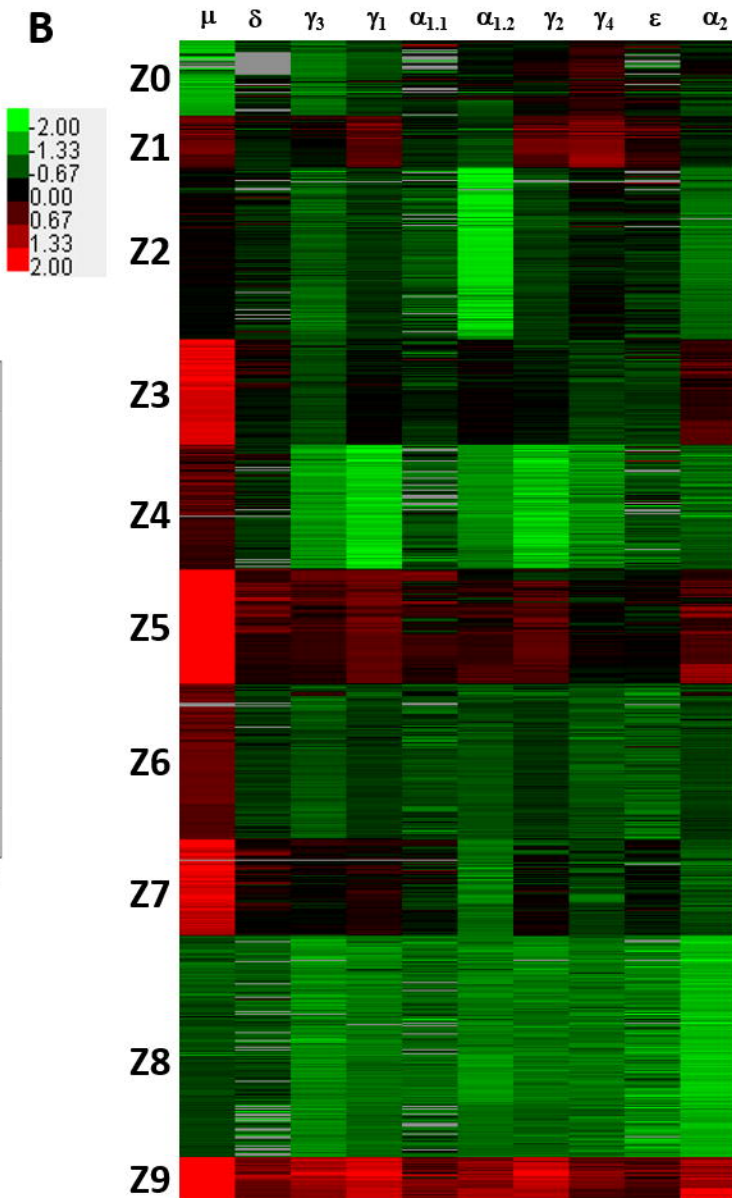

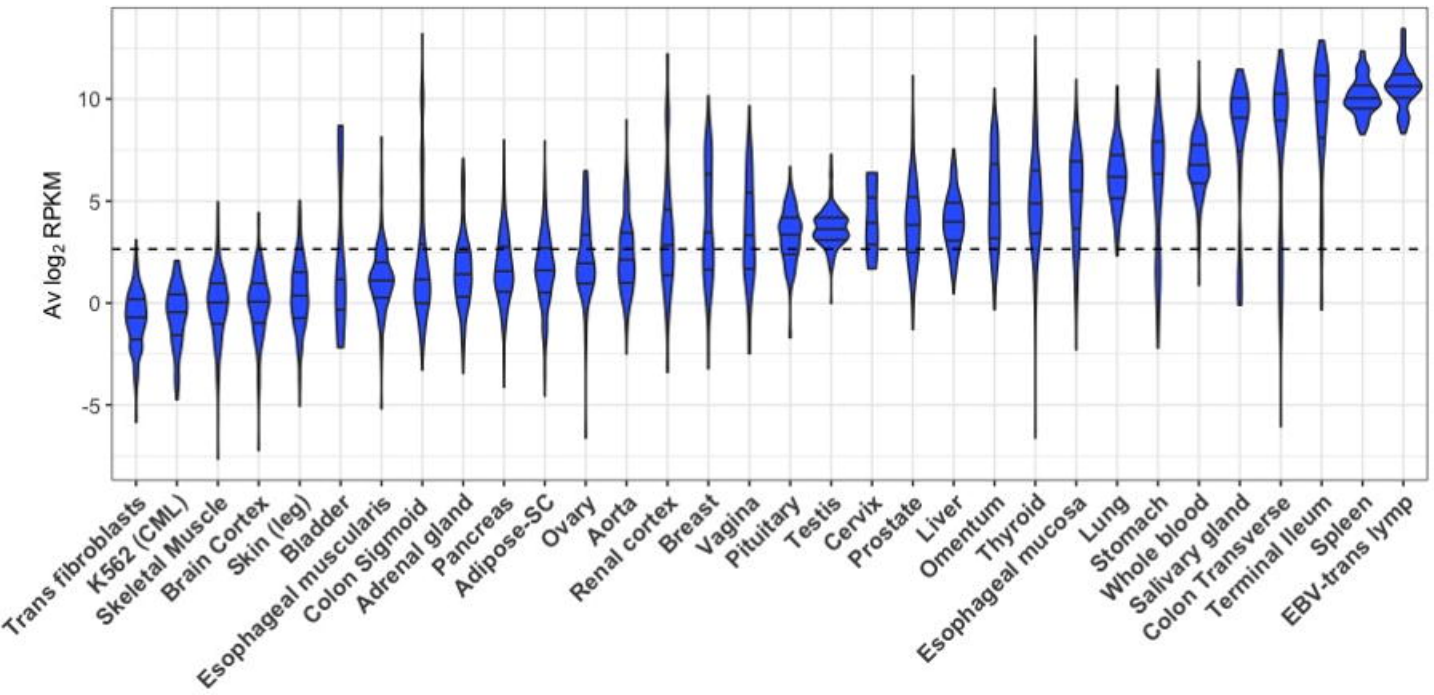

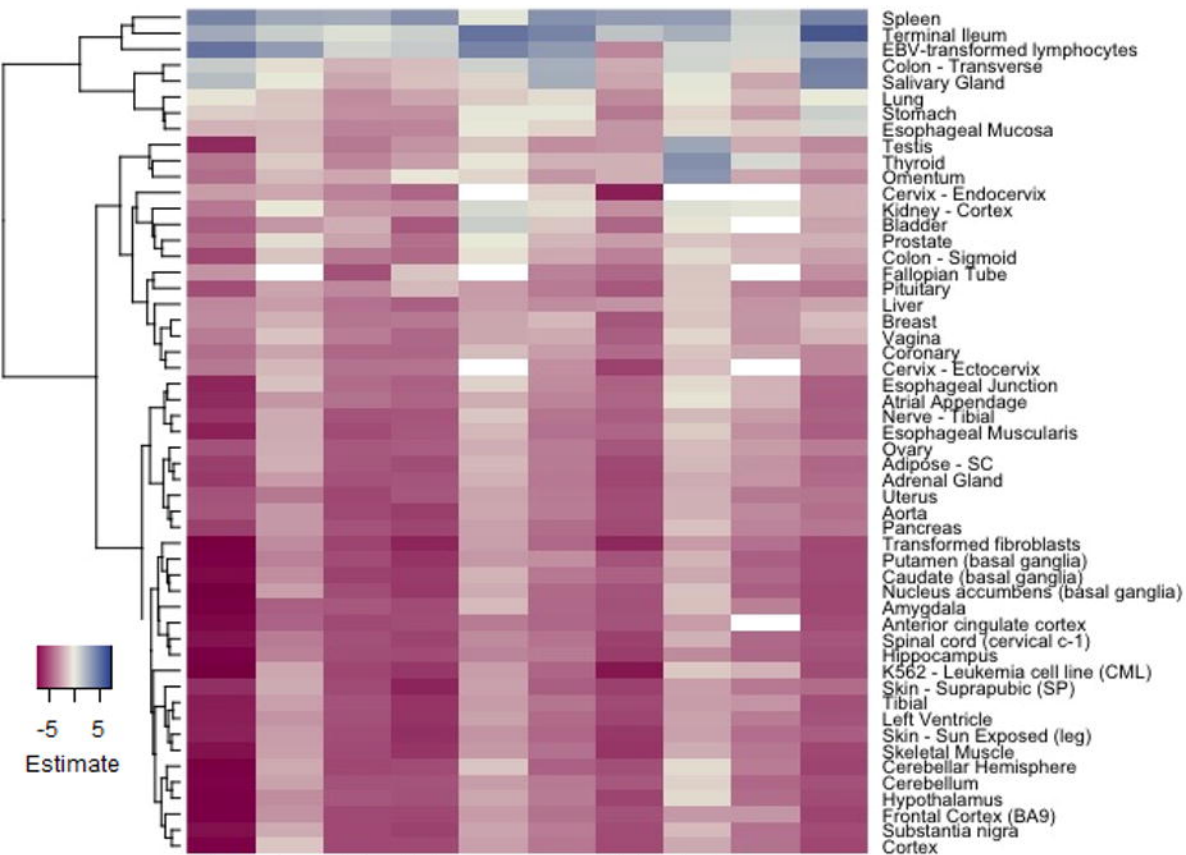

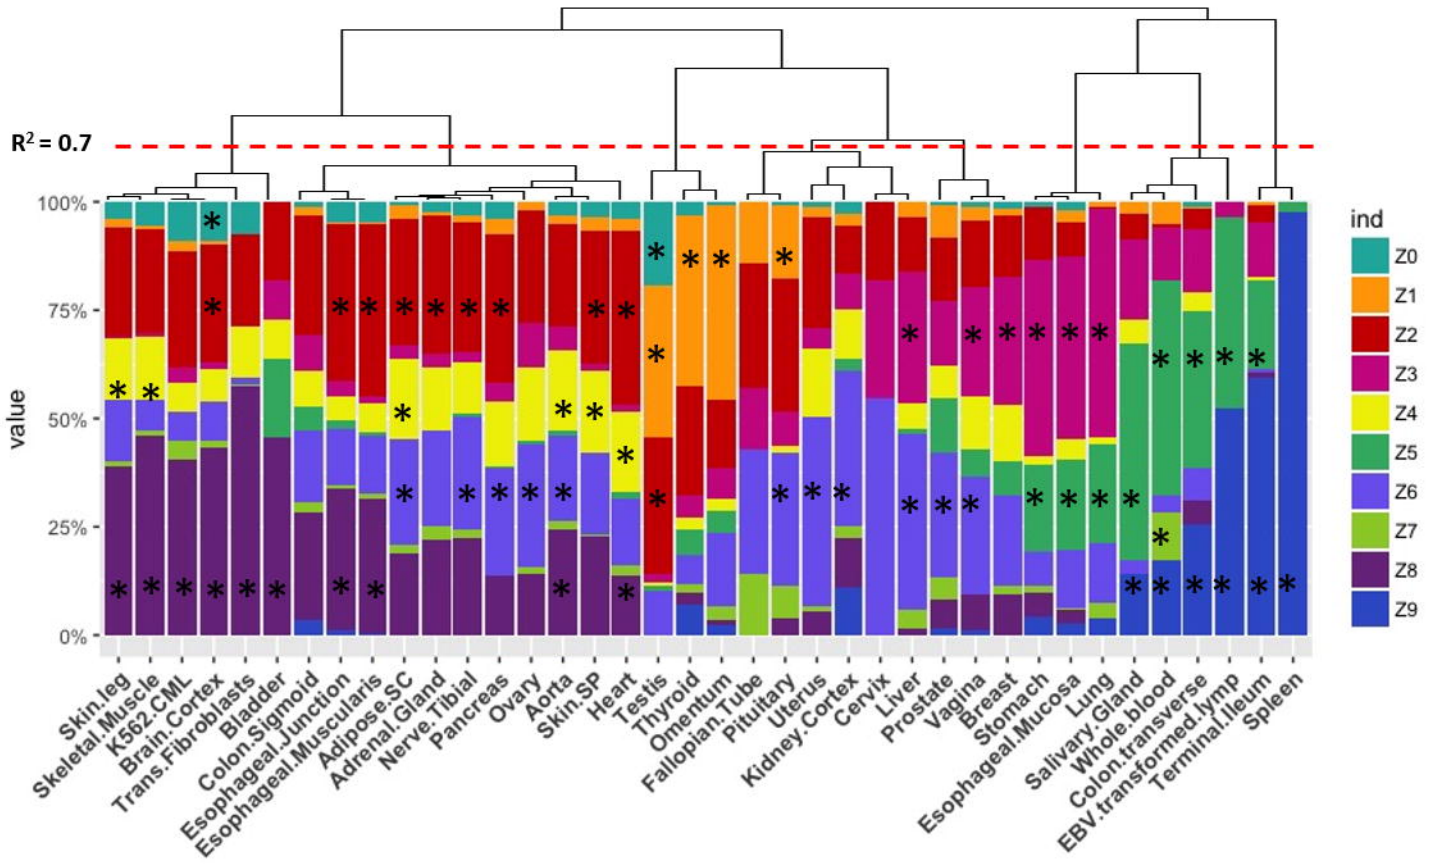



$C_H$  $I_H$ 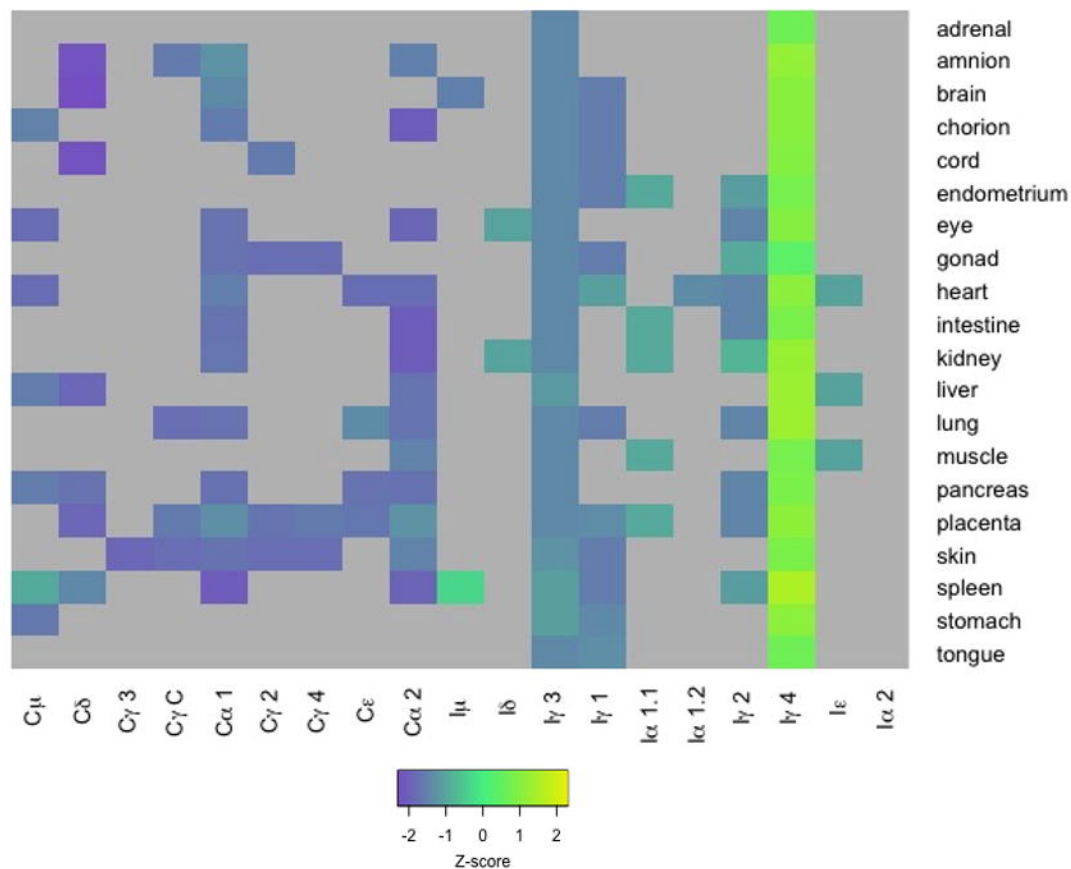

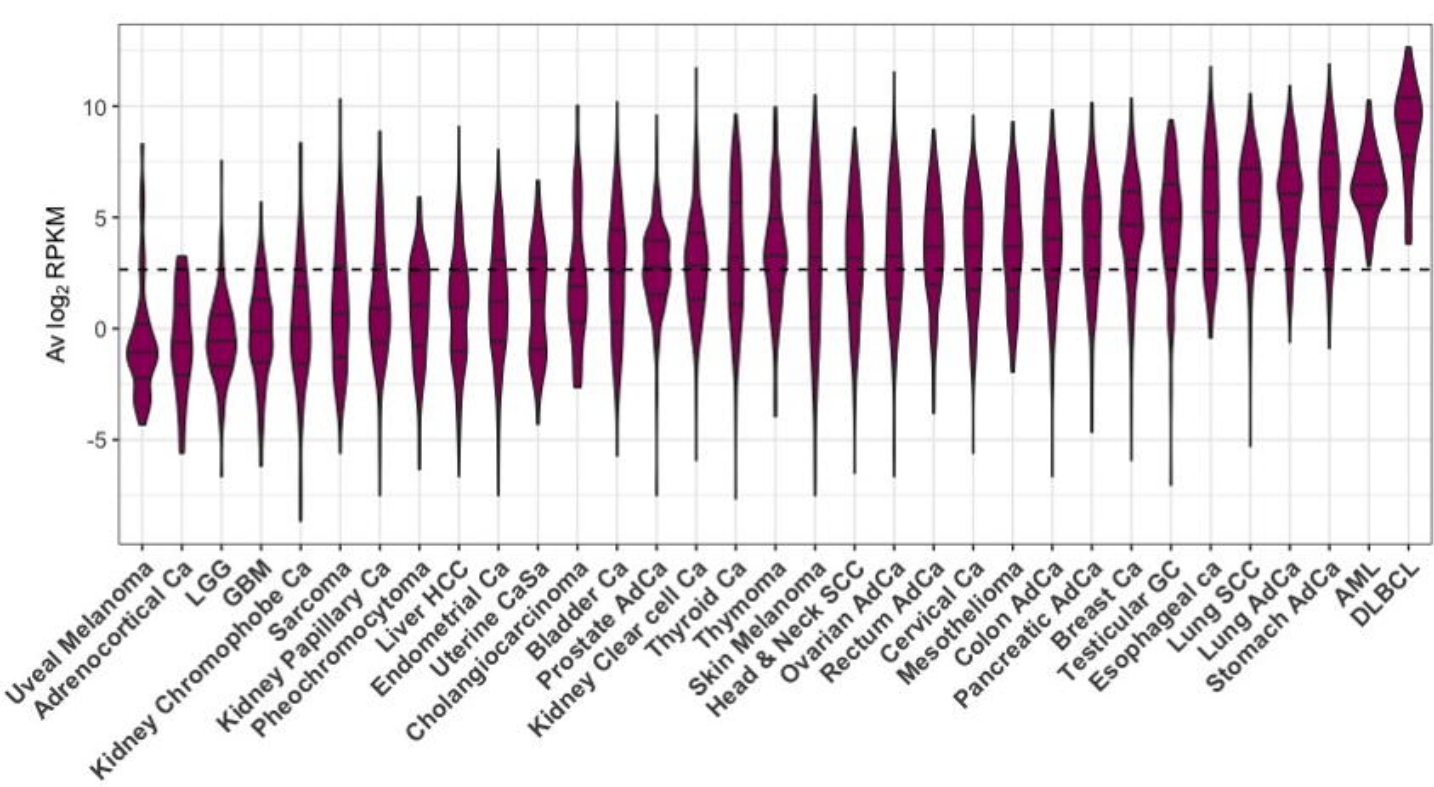

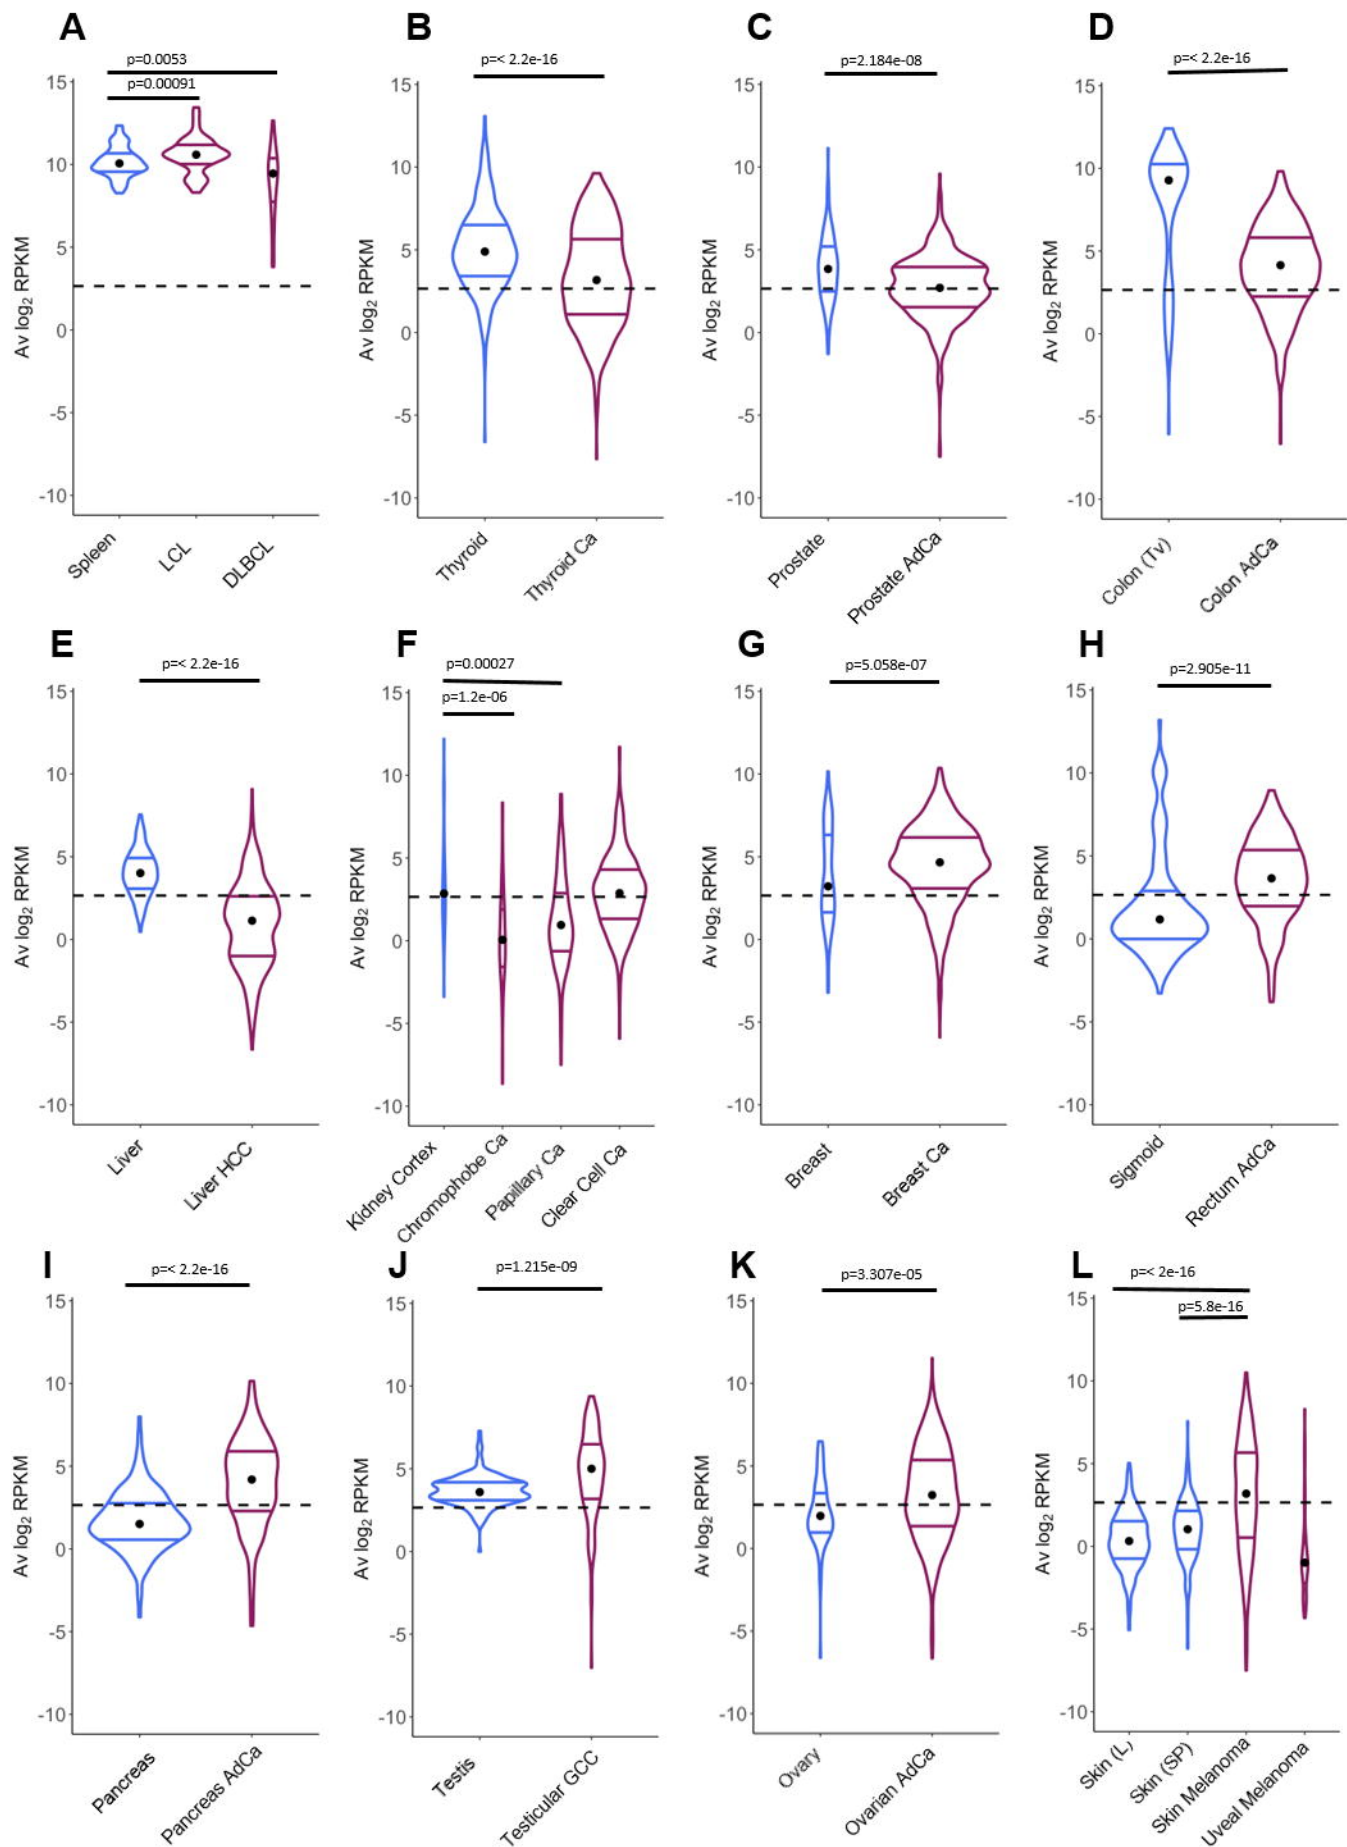

**A**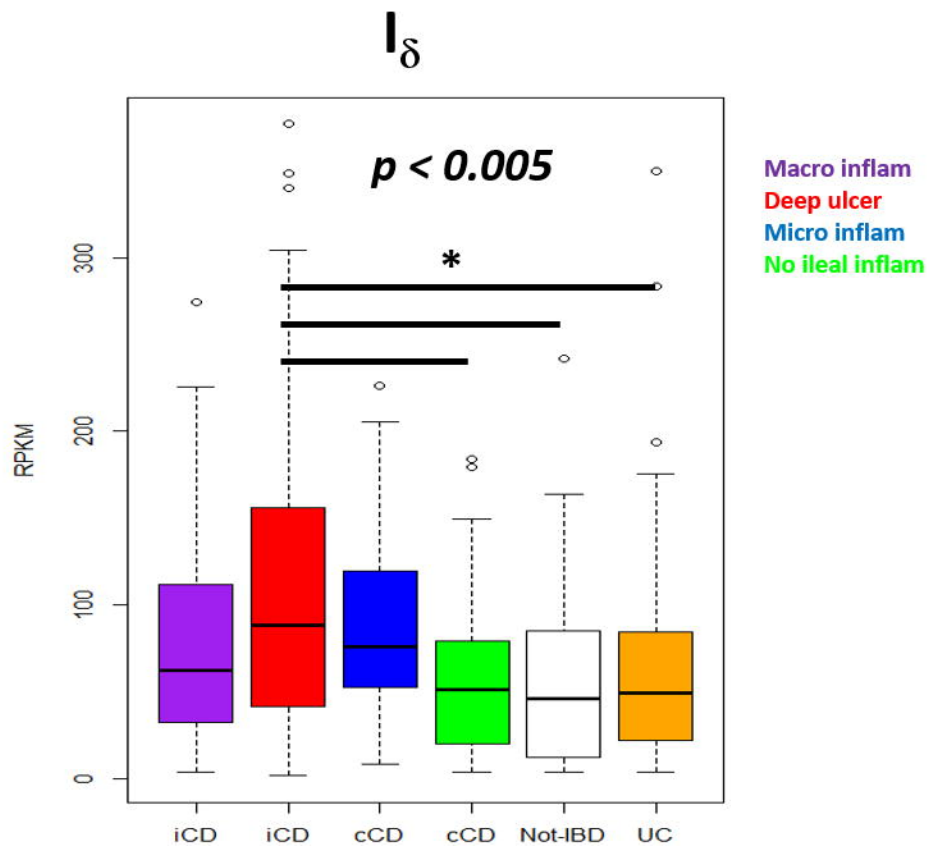**B**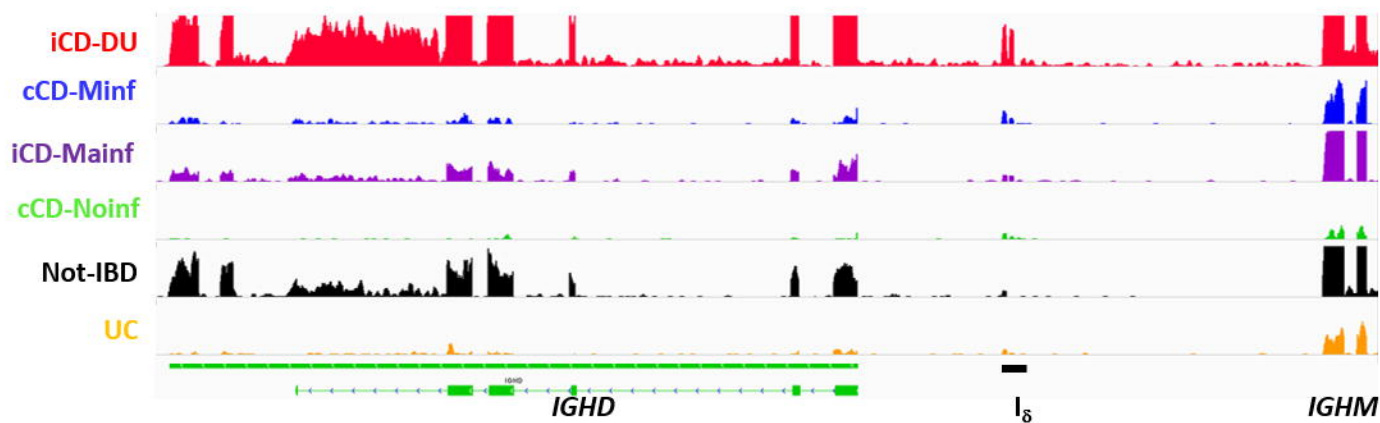

Source: https://www.biorxiv.org/content/10.1101/384172v1.full.pdf
